# Supplementary material
Source: PubMed Central journal article supplement (PMC5240993)
Supplement: NIHMS820231-supplement-5.pdf [file NIHMS820231-supplement-5.pdf]

# Structure

## Structural Basis of Interfacial Flexibility in Fibrin Oligomers

### Graphical Abstract

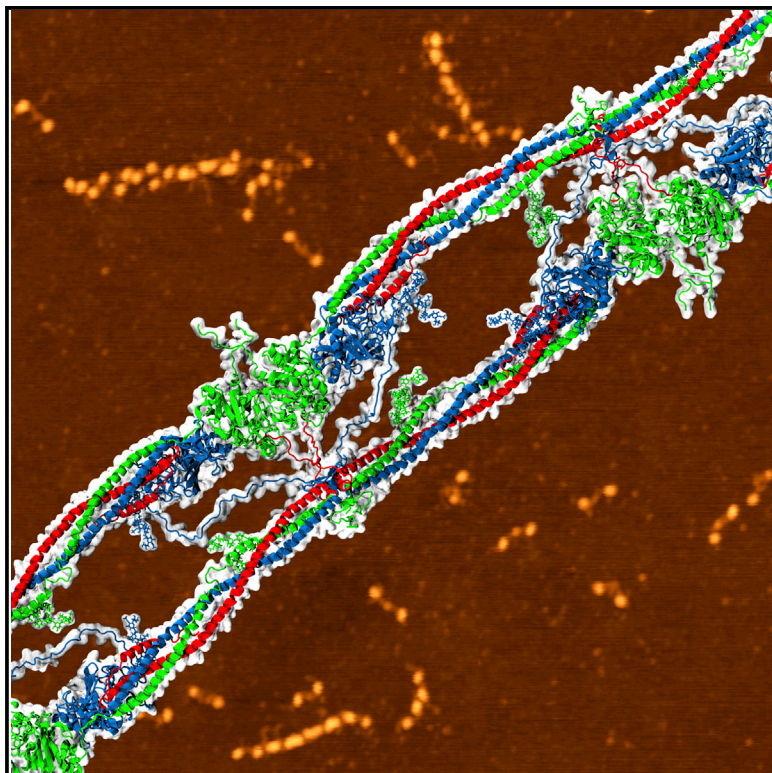

### Authors

Artem Zhmurov, Anna D. Protopopova, Rustem I. Litvinov, Pavel Zhukov, Alexander R. Mukhitov, John W. Weisel, Valeri Barsegov

### Correspondence

weisel@mail.med.upenn.edu (J.W.W.),  
valeri\_barsegov@uml.edu (V.B.)

### In Brief

Using the crystal structures of fibrin(ogen) and its fragments and advanced molecular modeling techniques, Zhmurov et al. recreate the full-atomic structures of single- and double-stranded fibrin oligomers and identify a hinge-like inter-monomer juncture region. These structures are validated by quantitative comparisons with high-resolution atomic force microscopy images.

### Highlights

- Atomic models for single- and double-stranded fibrin oligomer are reconstructed
- Structures are validated by quantitative comparison with high-resolution AFM images
- Structural basis for interfacial flexibility of fibrin oligomers is provided
- Atomic structure of the D:E:D interface beyond the knob-hole bonds is characterized

# Structural Basis of Interfacial Flexibility in Fibrin Oligomers

Artem Zhmurov,<sup>1</sup> Anna D. Protopopova,<sup>2</sup> Rustem I. Litvinov,<sup>2,3</sup> Pavel Zhukov,<sup>1</sup> Alexander R. Mukhitov,<sup>2</sup> John W. Weisel,<sup>2,\*</sup> and Valeri Barsegov<sup>1,4,5,\*</sup>

<sup>1</sup>Moscow Institute of Physics & Technology, Dolgoprudny, Moscow Region 141700, Russian Federation

<sup>2</sup>Department of Cell & Developmental Biology, Perelman School of Medicine, University of Pennsylvania, Philadelphia, PA 19104, USA

<sup>3</sup>Institute of Fundamental Medicine and Biology, Kazan Federal University, Kazan 420012, Russian Federation

<sup>4</sup>Department of Chemistry, University of Massachusetts, Lowell, MA 01854, USA

<sup>5</sup>Lead Contact

\*Correspondence: [weisel@mail.med.upenn.edu](mailto:weisel@mail.med.upenn.edu) (J.W.W.), [valeri\\_barsegov@uml.edu](mailto:valeri_barsegov@uml.edu) (V.B.)

<http://dx.doi.org/10.1016/j.str.2016.08.009>

## SUMMARY

Fibrin is a filamentous network made in blood to stem bleeding; it forms when fibrinogen is converted into fibrin monomers that self-associate into oligomers and then to polymers. To gather structural insights into fibrin formation and properties, we combined high-resolution atomic force microscopy of fibrin(ogen) oligomers and molecular modeling of crystal structures of fibrin(ogen) and its fragments. We provided a structural basis for the intermolecular flexibility of single-stranded fibrin(ogen) oligomers and identified a hinge region at the D:D inter-monomer junction. Following computational reconstruction of the missing portions, we recreated the full-atomic structure of double-stranded fibrin oligomers that was validated by quantitative comparison with the experimental images. We characterized previously unknown intermolecular binding contacts at the D:D and D:E:D interfaces, which drive oligomerization and reinforce the intra- and inter-strand connections in fibrin besides the known knob-hole bonds. The atomic models provide valuable insights into the submolecular mechanisms of fibrin polymerization.

## INTRODUCTION

Fibrin is an end product of blood clotting and forms the scaffold of hemostatic clots and obstructive thrombi in blood vessels. The molecular mechanisms of fibrin formation, its structure, and its properties are of fundamental biological importance. These are also related to clinical medicine and life-threatening pathologies, such as bleeding and thrombosis, including ischemic stroke and heart attack. Fibrin is produced from fibrinogen, a plasma protein, made of six paired polypeptide chains ( $A\alpha B\beta\gamma_2$ ) held together by S-S-bonds (Figure 1). Fibrin formation is initiated by the cleavage of fibrinopeptides A and B from the N termini of the  $A\alpha$  and  $B\beta$  chains of fibrinogen, respectively, to produce fibrin monomer ( $\alpha\beta\gamma_2$ ). The release of fibrinopeptide A exposes an N-terminal

$\alpha$  chain motif GPR called knob 'A' that binds to exposed holes 'a' in the globular  $\gamma$ -nodules located in another fibrin molecule (Everse et al., 1998; Kostelansky et al., 2002), resulting in A-a interactions (Laudano and Doolittle, 1978; Litvinov et al., 2005). Exposure of knobs 'A' is necessary and sufficient to form fibrin through the interaction with holes 'a'. The release of fibrinopeptides B exposes an N-terminal  $\beta$  chain motif GHR called knob 'B', which is complementary to holes 'b' located in the globular  $\beta$ -nodules of another fibrin molecule.

Fibrin polymerization is initiated when two fibrin molecules interact in a half-staggered fashion via the A-a knob-hole bonds (Weisel and Litvinov, 2013). Addition of a third molecule results in an end-to-end association where the lateral D regions of two molecules form the D:D interface (Figure 2). This comprises the monomer junction in each of two strands in fibrin oligomers (Everse et al., 1998). The D:D interface, which contains residues  $\gamma 275$ -309 (Everse et al., 1998) is weak, yielding first to a pulling force upon stretching of fibrin(ogen) oligomers (Zhmurov et al., 2011, 2012). Studies of point mutations revealed that residues  $\gamma 275$ ,  $\gamma 308$ , and  $\gamma 309$  are essential for D-D interactions and elongation of fibrin strands (Hirota-Kawadobora et al., 2004; Marchi et al., 2006; Bowley and Lord, 2009). Fibrin monomers can add longitudinally to form protofibrils, two-stranded oligomers that reach a certain length to begin lateral aggregation (Hantgan et al., 1980; Fowler et al., 1981; Medved et al., 1990). Side-to-side interactions between two strands are mediated by the central E region of one fibrin molecule and two lateral D regions of two other molecules (Figures 3 and 4). The D-E-D complex is held together mainly by the A-a knob-hole bonds and, possibly, by additional interactions at the D:E and D:D interfaces (Figure 5; Kononova et al., 2013). Protofibrils self-associate to form twisted fibers of variable thickness (Medved et al., 1990) with a regular 22.5 nm repeat corresponding to half the monomer length (Weisel, 2005). Fibrin fibers branch to form a 3D fibrin network (Weisel, 2005). Therefore, formation of the end-to-end intra-strand D:D interfaces and lateral inter-strand D:E:D interfaces are critical to fibrin polymerization.

Although the X-ray crystallographic studies of the fibrin(ogen) molecule and fibrin fragments provide valuable information about the structure of the D-D complex and a major part of the D-E-D complexes, this information is incomplete for the following reasons. First, the crystallographic structures do not resolve residues 395-411 at the C termini of the  $\gamma$  chains involved in the

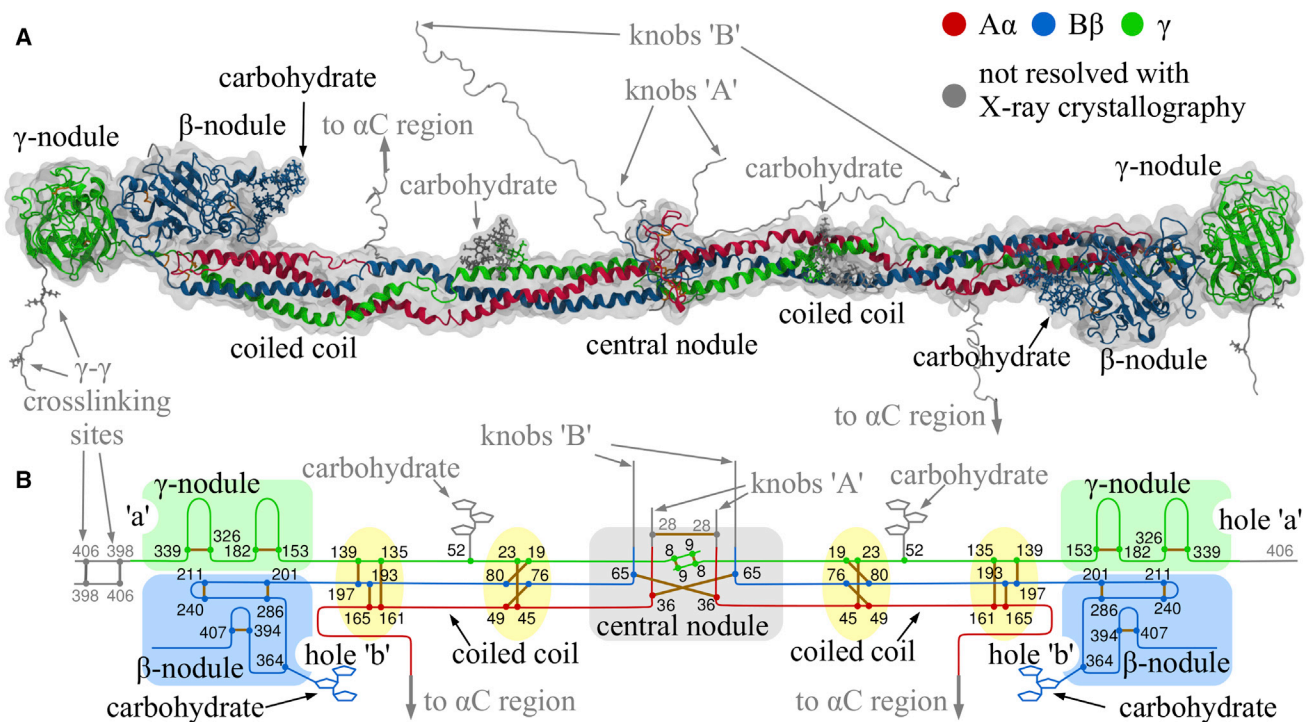

**Figure 1. Structure of Monomeric Fibrin**

(A) Crystal structure of the resolved parts of human fibrinogen (PDB: 3GHG) within its hydrodynamic volume.

(B) Schematic of fibrin(ogen) structure reinforced by 29 disulfide bonds (yellow), with the globular parts highlighted in light green ( $\gamma$ -nodule), light blue ( $\beta$ -nodule), and light gray (central nodule).

crosslinking initiated by factor XIIIa, the plasma transglutaminase, but these residues stabilize the D:D interface. Second, the structures do not resolve residues  $\alpha$ 17–26 and  $\beta$ 15–57 at the N termini of the  $\alpha$  and  $\beta$  chains, containing knobs 'A' and 'B', respectively, and, hence, they do not provide information about their interaction with holes 'a' and 'b'. However, the A-a and B-b knob-hole interactions are important non-covalent interactions in fibrin polymerization. Third, the X-ray data present a static picture of rigid monomers, thus ignoring local conformational fluctuations due to thermal excitations in protein domains, and underestimating the role of global dynamic structural transitions in fibrin molecules due to intra- and intermolecular interactions.

To uncover the structural details of the early stages of fibrin polymerization, we performed combined atomic force microscopy (AFM) and molecular modeling studies of single- and double-stranded fibrin oligomers. Based on thorough analysis of all 27 crystal structures of human fibrin(ogen) and its fragments resolved to date, we have reconstructed atomic models of short fibrin oligomers with knob-hole bonds and  $\gamma$ - $\gamma$  crosslinks. We correlated these models with high-resolution AFM images of fibrin oligomers and with X-ray crystallographic data on D-D and D-E interfacial junctions. These efforts have enabled us to provide a structural basis for the flexibility of fibrin oligomers due to D:D interface bending and to identify a hinge region. Furthermore, we have provided an atomic-level description of D:E:D interfaces between the central nodule and the peripheral  $\beta$ - and  $\gamma$ -nodules. We characterized the previously unknown intermolecular contacts that strengthen the A-a and B-b knob-

hole bonds. The results obtained advance our knowledge of the atomic structures of fibrin oligomers populated in early stages of fibrin polymerization and provide insights into intra- and inter-strand interactions. These results define the mechanism of fibrin formation and influence the biochemical and biomechanical properties of fibrin polymers at multiple spatial scales.

## RESULTS

### Flexibility of End-to-End Fibrinogen Oligomers from AFM Imaging

First, we used AFM to image single-stranded end-to-end fibrinogen oligomers formed by covalent crosslinking of fibrinogen with factor XIIIa, structures normally present in fibrin polymer in clots. In a mixture of monomeric and oligomeric fibrinogen molecules adsorbed on a surface (Figure 2), the majority of single-stranded oligomers were dimers, but trimers and longer oligomers were also detected. Most of the dimers ( $Fg_2$ ) and trimers ( $Fg_3$ ) formed by crosslinked fibrinogen monomers were in the bent conformation presumably due to flexible D:D interfaces (Figures 2A and 2B). To quantify the conformational flexibility of the D:D interfaces, we measured the bending angles between two adjacent fibrinogen molecules (Figure 2C, inset). Only dimers and trimers were included in the bending angle analysis because longer oligomers had a variable shape due to surface effects, which complicated the analysis. The histogram of the D-D angles (Figure 2C) revealed that only 18% of all structures were straight with  $\theta = 170^\circ$ – $180^\circ$  bending angles, whereas



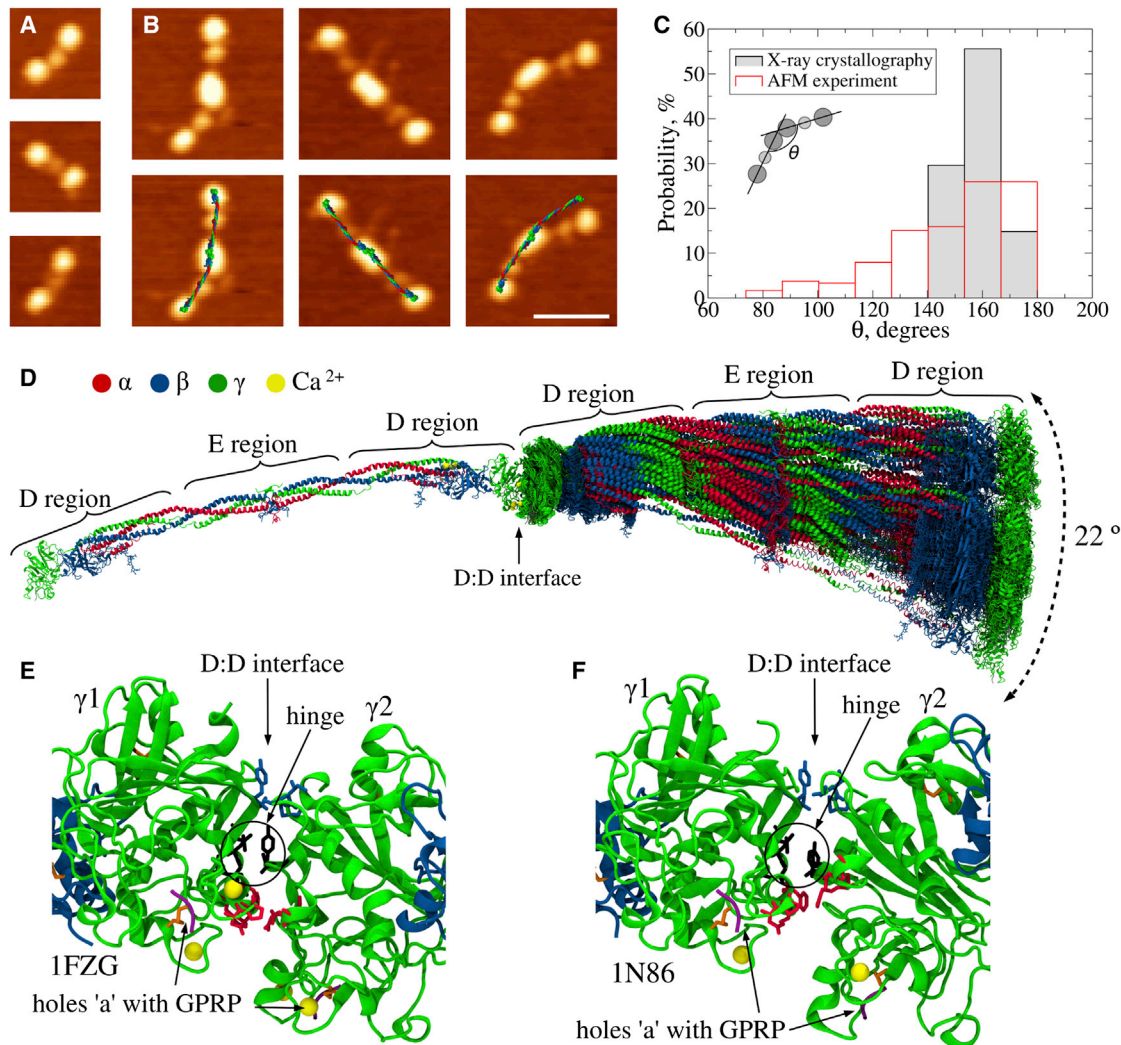

**Figure 2. Structure of the Single-Stranded Fibrinogen Oligomers**

(A) AFM images of fibrinogen molecules. Three distinct globular regions are visualized; the lateral D regions are larger than the central E region.  
 (B) AFM images of crosslinked fibrinogen dimers  $Fg_2$  (top) and same images with computationally reconstructed dimers superimposed (bottom). The superposition of reconstructed structures over AFM images was made by computational alignment of the centers of mass of D and E regions of in silico structures, with the geometrical centers of D and E regions determined from AFM. The scale bar represents 50 nm.  
 (C) Histograms of the bending angles formed by adjacent fibrinogen monomers in single-stranded fibrinogen oligomers from AFM images ( $n = 240$ ) and from in silico structures ( $n = 27$ ; Table S1). The inset illustrates how the bending angle ( $\theta$ ) is defined.  
 (D) Distribution of positions of the second (right) monomer relative to the first (left) monomer from 27 D-D structures in Table S1 (see Data S1). There is a  $22^\circ$  bending angle that quantifies variations in the relative orientation of monomers.  
 (E and F) Detailed view of two representative D:D interfaces from the PDB structures: bent arrangement (PDB: 1FZG) and linear arrangement (PDB: 1N86). The side chains forming stable interfacial contacts are shown with sticks; residues  $\gamma 1$ Ala279-Tyr280 and  $\gamma 2$ Asn308-Gly309 form a hinge (black); residues  $\gamma 1$ Ala271-Asp272 and  $\gamma 2$ Pro299-Ser300 favor the bent conformation (red); residues  $\gamma 1$ Ala241-Pro243 and  $\gamma 2$ Ala279-Tyr280 form contacts stabilizing the linear arrangement (blue). See also Figure S1 for a comparison of D-D interfacial contacts found in naturally occurring D-dimers (A) with those reported as crystal contacts (B) and for the results of the normal mode analysis (D and E); Figure S5A for SDS-PAGE of single-stranded oligomers; and Data S1.

$\sim 79\%$  of structures showed a  $\theta = 90^\circ$ – $170^\circ$  angle. Thus, the majority of single-stranded fibrinogen oligomers showed a large  $\sim 80^\circ$  angle bending owing to flexible D:D interfaces forming end-to-end intermolecular contacts.

#### Flexibility of D:D Interfaces from X-Ray Crystallography

To determine whether the flexibility of intermolecular end-to-end connections in solution is also characteristic of the crystalline

state, we used 27 crystallographically resolved D-D structures of either the D-dimer fibrin fragments or the D-D pairs of monomeric fibrinogen fragments D packed in a crystal (Table S1). We employed structure alignment to visualize possible arrangements of fibrin(ogen) molecules so that their mutual D:D interface corresponds to each of the 27 crystal structures (see Supplemental Information). For each structure, we obtained a particular end-to-end arrangement of two fibrin(ogen) molecules in which



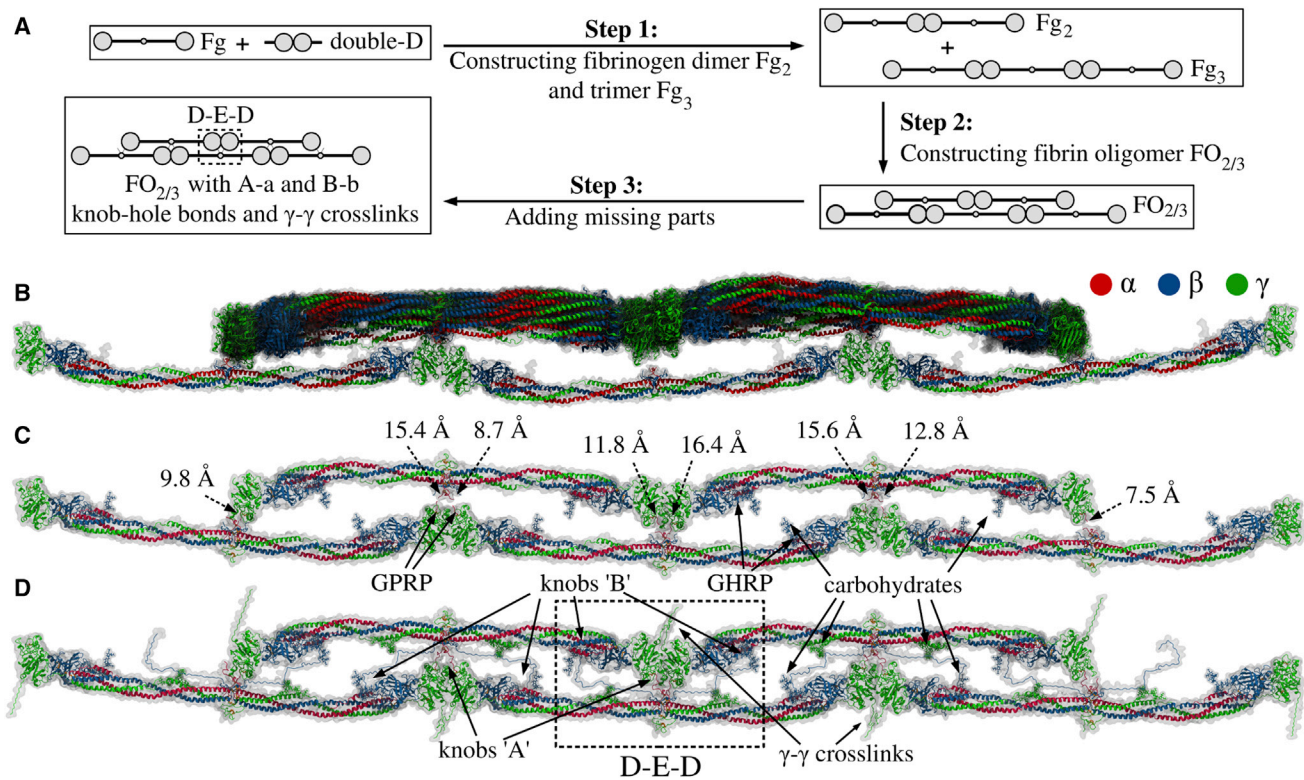

**Figure 3. Step-by-Step Reconstruction and Structure of Double-Stranded Fibrin Oligomer FO<sub>2/3</sub>**

(A) Steps 1–3 summarize the procedure used to reconstruct double-stranded fibrin oligomer FO<sub>2/3</sub> (see [Experimental Procedures](#)). As the input, we use the atomic structural models of human fibrinogen (PDB: 3GHG; [Kollman et al., 2009](#)) and double-D fragment (PDB: 1N86; [Yang et al., 2002](#)). These structures are utilized in step 1 to create fibrinogen dimer Fg<sub>2</sub> and trimer Fg<sub>3</sub>, which are used in step 2 to construct a double-stranded fibrin oligomer FO<sub>2/3</sub> with two/three monomers in the upper/lower strand. The initial model of FO<sub>2/3</sub> does not contain knobs ‘A’ and ‘B’ and the  $\gamma$ - $\gamma$  crosslinks, which are incorporated in step 3. To remove steric clashes and to minimize the potential energy of the obtained conformation of FO<sub>2/3</sub>, this step is followed by energy minimization. See also [Figure S2](#) for geometric constraints used in Monte Carlo docking.

(B) Superposition of all 14 successfully reconstructed structures from the Monte Carlo docking (see [Supplemental Information](#)).

(C and D) Representative structures of FO<sub>2/3</sub> before and after the incorporation of missing residues: knobs ‘A’ and ‘B’ and  $\gamma$ - $\gamma$  crosslinks (see [Data S2](#)). (C) also shows the distances for all eight constraints due to A-a knob-hole bonds. See also [Figure S2](#) and [Data S2](#).

the D regions form an angle corresponding to a D-D-structure from [Table S1](#). This allowed us to examine all possible geometries of the D-D associations in crystals ([Figure 2D](#); [Data S1](#)). The angle formed by the monomers in the reconstructed dimers was found to fluctuate between  $\theta = 149^\circ$  and  $171^\circ$  ([Figure 2C](#)), further supporting our conclusion that fibrinogen oligomers are capable of bending. A comparison of the bending angles from AFM imaging and X-ray crystallography revealed that the  $\theta$ -angle fluctuations in a crystalline state were within the range from AFM ([Figure 2C](#)). To verify the fibrinogen dimer model we superimposed in silico reconstructed dimers with the corresponding AFM images and obtained a very good overlap between the two types of data for relatively straight dimers ( $\theta > 140^\circ$ ; [Figures 2B](#) and [2C](#)). The agreement for bent dimers ( $\theta < 140^\circ$ ) was worse due to lower angle variation of the X-ray data.

### Structure of the D:D Interface

Large bending angle variations observed in AFM and X-ray crystallography ([Figures 2C](#) and [2D](#)) have enabled us to hypothesize the existence of a flexible hinge in the D:D interface. To identify the residues that comprise the pivotal point, we analyzed the interface of

two  $\gamma$ -nodules in the double-D structures ([Table S1](#)). Owing to the asymmetry of the D-D contacts, the  $\gamma$ -nodules were designated  $\gamma_1$  and  $\gamma_2$  ([Figures 2E](#) and [2F](#)). The  $\gamma_1$ - $\gamma_2$  contacts were defined as those having a C $_{\alpha}$ -C $_{\alpha}$  distance of less than the standard 8 Å cut-off distance ([Mickler et al., 2007](#); [Zhmurov et al., 2010](#)). Analysis of the inter-residue contacts reinforcing the D-dimer’s structures enabled us to identify the amino acids that form contacts at the D:D ( $\gamma_1$ : $\gamma_2$ ) interface:  $\gamma_1$ Ala241-Pro243 with  $\gamma_2$ Ala279-Tyr280;  $\gamma_1$ Met264 with  $\gamma_2$ Ala279;  $\gamma_1$ Ala271-Asp272 with  $\gamma_2$ Pro299-Ser300;  $\gamma_1$ Ala279-Tyr280 with  $\gamma_2$ Thr277 and  $\gamma_2$ Asn308-Gly309;  $\gamma_1$ Thr277 and  $\gamma_1$ Gly309 with  $\gamma_2$ Phe303. Next, we profiled the root-mean-square fluctuations (RMSF) of the positions of residues in  $\gamma_2$  relative to the  $\gamma_1$ -nodules and positions of residues in  $\gamma_1$  relative to  $\gamma_2$  across all crystal structures. Assuming that the strongest contacts between residues with the smallest RMSF would correspond to the “hinge region” ([Figure S1C](#)), we identified a group of four contacts formed by residues with the smallest 1.5–1.7 Å RMSF values:  $\gamma_1$ Ala279- $\gamma_2$ Asn308;  $\gamma_1$ Tyr280- $\gamma_2$ Asn308;  $\gamma_1$ Ala279- $\gamma_2$ Gly309; and  $\gamma_1$ Tyr280- $\gamma_2$ Gly309 ([Figures 2E](#), [2F](#), and [S1C](#)). These contacts comprise the pivotal point in the hinge region at the D:D interface. We also performed a normal

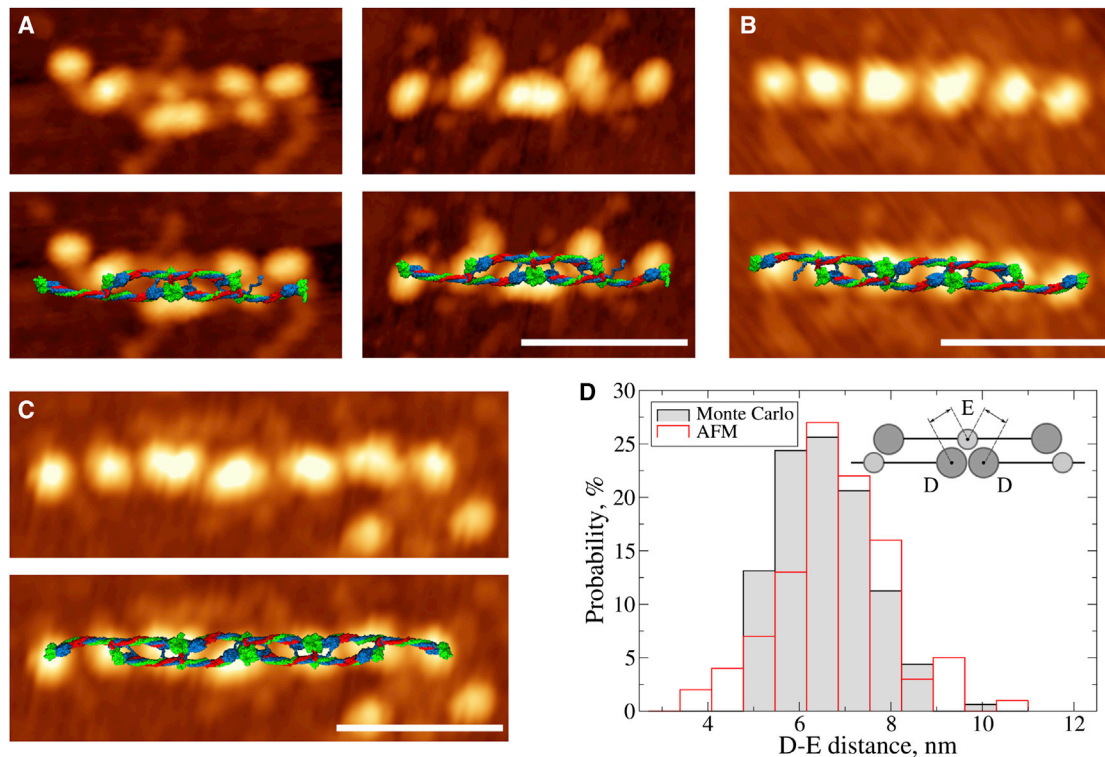

**Figure 4. AFM Images and In Silico Structures of Two-Stranded Fibrin Oligomers**

(A–C) AFM images of fibrin oligomers: trimer (A), tetramer (B), and pentamer (C). The bottom row displays AFM images with in silico structures superimposed. Due to the larger flexibility of shorter oligomers, the superposition is better for the longer structures (B and C) compared with the shorter structures (A). The scale bars represent 50 nm.

(D) Histograms of the D-E distances from AFM image analysis and in silico structures obtained in step 2 (see Figure 3). The inset in (D) shows a schematic illustrating how the distance between nodules of the D and E regions was measured. See also Figure S3 for additional AFM images.

mode analysis (see Supplemental Information) for the dimer Fg<sub>2</sub> reconstructed in silico using the PDB structure (PDB: 1FZG) for the bent D:D interface. We found several bending deformation modes for monomers around their pivotal point (Figures S1D and S1E), providing additional evidence for the hinge region at the D-D junction and revealing dynamic signatures of the D:D-interfacial flexibility.

### Two Types of D:D Interfaces in Crystals

To distinguish between the inter-residue contacts forming the straight versus bent arrangements of single-stranded fibrinogen oligomers, we performed clustering analysis (see Supplemental Information) using all available D-D PDB entries (Table S1). This revealed two main structure groups, one of which clustered around the PDB structure (PDB: 1N86) for the straight connection (cluster 1; Figure S1) and the other clustered around the PDB entry (PDB: 1FZG) for the bent connection (cluster 2; Figure S1). Cluster 2 had 19 structures and cluster 1 had only five structures, implying that the bent conformation of the D-D complex was more favorable. The remaining three D-D structures neither matched any of the two groups nor formed a separate cluster, and so they were excluded from the analysis. There were common contacts in both clusters, but the contacts between residues  $\gamma$ 1Ala241-Pro243 and  $\gamma$ 2Ala279-Tyr280 were more frequent in the straight dimers. The bent dimers had unique

contacts not detected in the straight form, namely  $\gamma$ 1Ala271-Asp272 and  $\gamma$ 2Pro299-Ser300. The bent and straight conformations also had very different values of solvent-accessible surface area ( $S_{D:D}$ ) for the D:D interface:  $S_{D:D} \approx 2,150 \text{ \AA}^2$  (bent) versus  $S_{D:D} \approx 1,600 \text{ \AA}^2$  (straight), indicating that the D:D interface is tighter in the bent conformation. The numbers of interfacial residue-residue contacts, i.e., 30 (bent) versus 20 (straight), indicate that the bent conformation is slightly more stable thermodynamically, also explaining why 19 out of 27 double-D crystal structures (Table S1) are bent (Figure S1).

### Constructing Double-Stranded Fibrin Oligomers

To elucidate the structural basis of fibrin polymerization, we reconstructed atomic models of double-stranded fibrin oligomers formed at early steps of fibrin polymerization. Two linear strands of fibrin(ogen) molecules were associated laterally based on the spatial constraints described below. Because the end-to-end D-D interactions are the same both in fibrinogen and in fibrin, the structures of the D:D interface characterized above were used to form the linear fibrin constructs. Here, we outline the step-by-step reconstruction of the fibrin oligomer (named FO<sub>2/3</sub>), which comprises a linear strand of two fibrin molecules associated laterally in a half-staggered fashion with a linear strand of three monomers (Figure 3A). In step 1, we performed the linear alignment of the dimer and trimer (Figure 3A) using



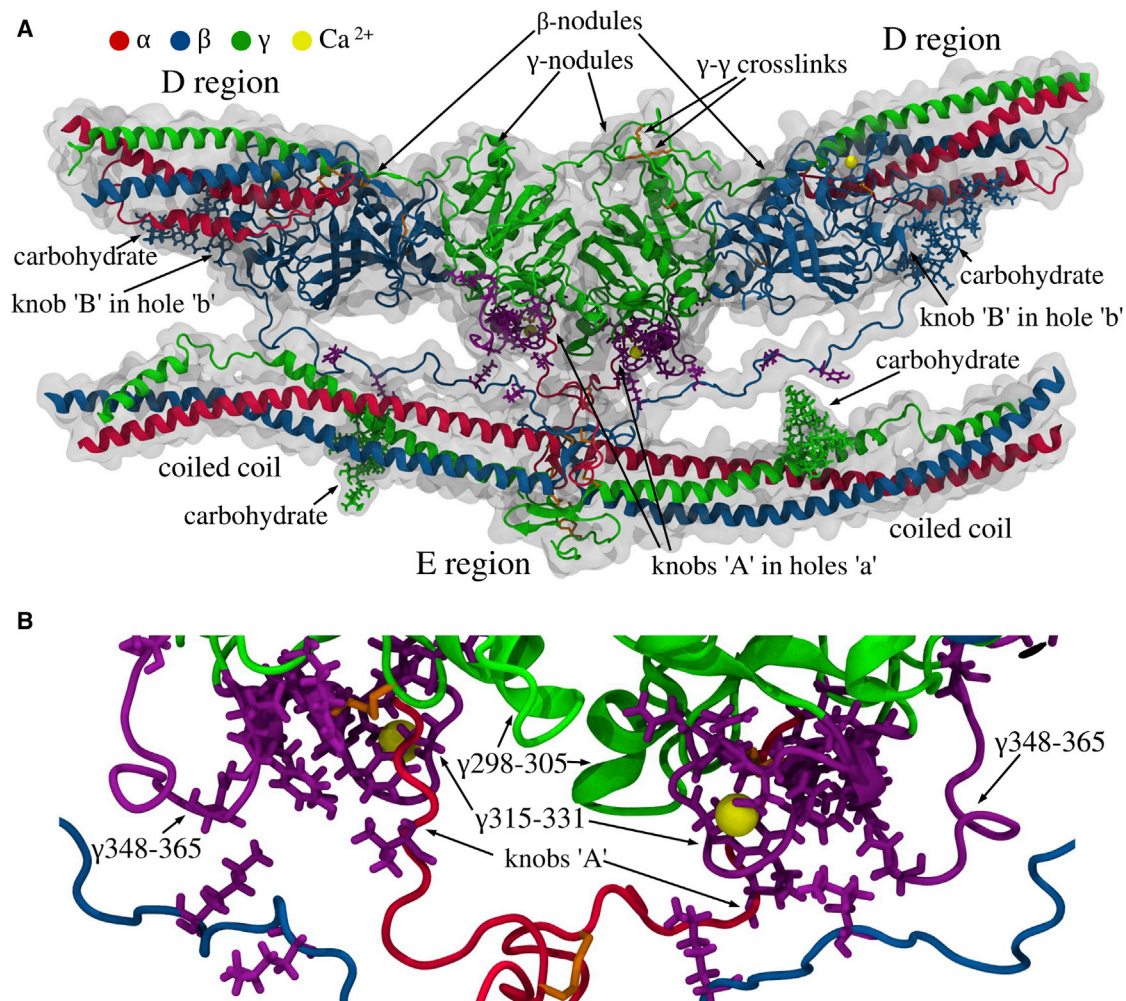

**Figure 5. Structure of the D-E-D Complex**

(A) The D regions of two adjacent molecules in the upper strand with the  $\gamma$ - and the  $\beta$ -nodules, and the E region of the third fibrin molecule in the lower strand with parts of the coiled coils. Also shown are the carbohydrate chains, two pairs of knobs 'A' and 'B' in the E region of the lower molecule bound, respectively, to holes 'a' (in the  $\gamma$ -nodules) and 'b' (in the  $\beta$ -nodules) of the upper molecules, the  $\gamma$ - $\gamma$  crosslinks, and calcium ions (see [Data S3](#)).

(B) Magnified view of the D-E complex with the residue contacts stabilizing the D:E interfaces. The purple side chains mark the single-point mutations in fibrinogen variants (see [Table S2](#)). The loops  $\gamma$ Tyr348-Asn365 and  $\gamma$ Trp315-Gly331 in the  $\gamma$ -nodules, where most of the natural mutations occur, are shown in purple. The figure is based on MD simulations with the SASA implicit solvent model (see [Supplemental Information](#)). MD simulations of the  $\gamma$ -E- $\gamma$  fragment in explicit solvent (see [Supplemental Information](#)) show similar results, with identical residue-residue contacts between amino acids in the  $\gamma$ -nodules and E region. See also [Figure S4](#) for details of the B-b knob-hole interactions; and [Data S3](#).

the PDB structure (PDB: 1N86) that corresponds to the D-dimer fragment from crosslinked fibrin in the straight configuration ([Figures 2 and S1](#)). In step 2, we used atomic models of single-stranded dimer  $Fg_2$  and trimer  $Fg_3$  to perform 20 Monte Carlo docking simulations (see [Supplemental Information](#)). Here, the objective was to bring the two single-stranded oligomers closer together while keeping their molecular half-staggered arrangement, so that two D-E and four D-E-D complexes could form ([Figures 3 and S2](#)). The following spatial constraints were satisfied: two fibrin strands should be within the 26.6 Å distance to allow formation of the A-a knob-hole bonds. These are formed by the nine-residue-long N-terminal peptides of the  $\alpha$  chains bearing knobs 'A' and the  $\gamma$ -nodules with complementary holes 'a' (see [Experimental Procedures](#) and [Figure S2A](#)). Of 20 Monte

Carlo runs, 14 were successful, i.e., all the knob-hole bond constraints were satisfied at the end of each run (there are eight A-a knob-hole bonds in  $FO_{2/3}$ ; see [Figure S2B](#)). We found that 14 final structures ([Figure 3B](#)) cluster around the average fibrin oligomer  $FO_{2/3}$  structure ([Figure 3C](#)) with a root-mean-square deviation <2.5 nm.

#### Experimental Verification of Fibrin Oligomer Models

First, we compared the molecular dimensions of pentamers  $FO_{2/3}$  from the virtual structure set ([Figure 3B](#)) and AFM images ([Figures 4A–4C and S3A–S3D](#)) using the D-E distance between the center of globular parts of D region in one strand and the center of the globular part of contiguous E region in the other. To better resolve the experimental D-E distance, we analyzed AFM



images of fibrin oligomers from trimers FO<sub>1/2</sub> (Figures 4A and S3A) to dodecamers FO<sub>6/6</sub> (Figures 4B, 4C, and S3B–S3D). The average experimental D-E distance was  $6.8 \pm 1.2$  nm, which compared well with the  $6.5 \pm 0.9$  nm value from in silico structures of FO<sub>2/3</sub>. We also analyzed the dynamics of the D-E distance in the Monte Carlo docking simulations, which showed rapid convergence to the average structure of FO<sub>2/3</sub> (Figure S3E). Next, we compared the histograms of experimental and theoretical D-E distances (Figure 4D), which shows the overlap of theoretical and experimental distributions. The minimal D-E distances were 4.8 versus 3.5 nm and the maximal distances were 9.7 versus 10.4 nm for the virtual models and AFM images, respectively. The excellent agreement between the D-E distances in atomic models and AFM images of fibrin oligomers validates our in silico model of FO<sub>2/3</sub>.

### Incorporating Missing Residues Unresolved in X-Ray Crystallography

Two strands of fibrin oligomers are held together in the D-E-D complex consolidated mainly by the A-a and B-b knob-hole bonds (Litvinov et al., 2005, 2007). In addition, the D-E-D complex is stabilized by covalent bonds by factor XIIIa between the  $\gamma$ -nodules of adjacent fibrin molecules. Although the FO<sub>2/3</sub> construct lacks the  $\gamma$ - $\gamma$  crosslinks and A-a and B-b knob-hole bonds, it conforms to the distance constraint allowing knobs 'A' and 'B' to reach holes 'a' and 'b' (see Experimental Procedures and Figure S2). Therefore, in step 3 (Figure 3A): (1) knob 'A'-containing N-terminal peptide (GPRV,  $\alpha$ 17-20) inserted into hole 'a' was tethered to the structured part of the  $\alpha$  chain via the VERHQS motif (see Experimental Procedures) stretched between  $\alpha$ Val20 and  $\alpha$ Ala27 (Figure S2); and (2) knob 'B' (GHRP,  $\beta$ 15-18) placed into hole 'b' was tethered to the structured part of the  $\beta$  chain by the LDK KRE EAP SLR PAP PPI SGG GYR ARP AKA AAT QKK VER sequence (see Experimental Procedures and Supplemental Information) stretched between  $\beta$ Pro18 and  $\beta$ Lys58 (Figures 5 and S4). In step 3 we also incorporated: (3) the unresolved residues in the C-terminal parts of  $\beta$  and  $\gamma$  chains ( $\beta$ Pro459-Gln461 and  $\gamma$ Gly395-Val411); and (4) covalent bonds linking the residues involved in the  $\gamma$ - $\gamma$  crosslinking ( $\gamma$ Gln398,  $\gamma$ Gln399, and  $\gamma$ Lys406; see Experimental Procedures). After several rounds of extensive energy minimization (Experimental Procedures), we arrived at the complete structure of short double-stranded fibrin oligomer FO<sub>2/3</sub> with  $\gamma$ - $\gamma$  crosslinks and A-a and B-b knob-hole bonds (Figure 3D). This is an important building block for the elongation of two-stranded fibrin oligomers and their transformation into fibrin protofibril (see Data S2).

### Structure of the D:E:D Interface

In our previous study, we hypothesized that A-a knob-hole interactions are not limited to binding of knob 'A' to hole 'a', and that the D:E interfaces reinforcing the D-E-D complex structure also contain the inter-strand contacts that stabilize fibrin polymers (Litvinov et al., 2005; Kononova et al., 2013). We utilized the full atomic structure of FO<sub>2/3</sub> to identify the binding contacts (beyond knob-hole bonds) that stabilize the interface between the E and D regions (Figure 5, Data S3). Specifically, we carried out three 50 ns Molecular Dynamics (MD) simulation runs in explicit water and three 100 ns MD simulations in implicit solvent

(see Experimental Procedures and Supplemental Information) and analyzed the strong contacts that persisted at least 50% of the time. Residues  $\alpha$ Val20-Lys29 (adjacent to the knob 'A' sequence  $\alpha$ Gly17-Arg19) were found to interact with the  $\gamma$ -nodule, especially with residues  $\gamma$ Asp298-Phe304,  $\gamma$ Asn319-Asn325, and  $\gamma$ Gln329 near the "entrance" to hole 'a'. We observed contact formation between the N-terminal part of the  $\beta$  chain (beyond the knob 'B' sequence  $\beta$ Gly15-Pro18) including residues  $\beta$ Lys53-Pro60 and  $\beta$ Pro70-Asp71 and residues in the  $\gamma$ -nodule. We also observed formation of binary contacts between residues  $\alpha$ Leu54,  $\alpha$ Glu57,  $\alpha$ Phe62,  $\alpha$ Arg65,  $\gamma$ Gln33,  $\gamma$ Asp37, and  $\gamma$ Gln49 in the coiled coil and  $\gamma$ Gln329-Asp330 in the  $\gamma$ -nodule. The most important residues in the D regions interacting with the E region are clustered in three loops:  $\gamma$ Trp315-Gly331,  $\gamma$ Tyr348-Asn365, and  $\gamma$ Asp298-Thr305 (Figure 5B). In loop  $\gamma$ Trp315-Gly331, which is one of the main structural determinants of hole 'a' (Kononova et al., 2013; Pratt et al., 1997), residues  $\gamma$ Gln329 and  $\gamma$ Asp330 are involved in A-a bond formation through interaction with residue  $\alpha$ Arg17 in knob 'A'. Loop  $\gamma$ Tyr348- $\gamma$ Asn365 is also important for the D-E interactions because it forms contacts with residues in knob 'B' and in the coiled coils (Figure 5A).

### DISCUSSION

Fibrin oligomers are intermediate structures that determine the final arrangement of the fibrin network (Weisel and Litvinov, 2013). The experimental isolation and characterization of fibrin oligomers is challenging because they form highly unstable heterogeneous structures due to rapid self-assembly. To gather structural and mechanistic information on fibrin polymerization, we performed a combined experimental and theoretical study employing experimental single-molecule imaging and computational molecular modeling of fibrin oligomers. We were able to reconstruct the atomic structural models of short double-stranded fibrin oligomers, which were correlated with high-resolution AFM images. These efforts have enabled us to provide the structural basis of the remarkable flexibility of fibrin polymers with an unprecedented degree of spatial resolution.

An important step in fibrin polymerization is the end-to-end D-D interactions in the same strands within two-stranded fibrin oligomers. To isolate these interactions from other intermolecular contacts and study them separately, we reproduced polymerization of fibrinogen catalyzed by the transglutaminase, factor XIIIa, an active form of factor XIII zymogen activated by thrombin in the presence of Ca<sup>2+</sup>. The C-terminal portion of each of fibrin(ogen)'s  $\gamma$  chains contains a crosslinking site at which two adjacent molecules form an intermolecular  $\epsilon$ -( $\gamma$ -glutamyl)-lysyl covalent isopeptide bond between the  $\gamma$ Lys406 in one  $\gamma$  chain and  $\gamma$ Gln398/399 in the other  $\gamma$  chain. This reaction resulting in formation of a gel without proteolytic cleavage of fibrinogen is evolutionarily older than thrombin-induced activation and polymerization of fibrin(ogen) (Lorand and Conrad, 1984; Yeh et al., 1998). Factor XIIIa-induced polymerization of fibrinogen was reproduced in earlier studies (Blombäck et al., 1985; Weisel et al., 1993) in which single-stranded fibrin oligomers were synthesized in vitro. These single-stranded fibrin oligomers were visualized using transmission electron microscopy, which showed the conformational variability (Brown et al., 2007).

The high-resolution AFM imaging of crosslinked single-stranded fibrinogen oligomers revealed that the bonds formed between the lateral D regions of two adjacent monomers are relatively flexible, thus deviating from the straight configuration by a  $\sim 60^\circ$  or more bending angle (Figure 2). This was confirmed by a thorough theoretical analysis of all 27 available crystal structures that comprise possible types of D-D interactions, including the natural crosslinked D-dimers from fibrin and D-D contacts between fibrinogen molecules or fibrin(ogen)-derived fragments D originating from crystal packing. Not surprisingly, the degree of flexibility of the D-D contacts in crystals was substantially smaller and varied within  $22^\circ$  bending angle. Because crystal packing might affect the protein structure making the protein-protein interactions potentially nonspecific and physiologically irrelevant, we divided all 27 crystal structures of the D-D complex into two groups, comprising either naturally formed or artificial D-D structures: 12 crystal structures of natural D-dimers formed in fibrin and 14 structures with D-D complexes in a crystal lattice. Figure S1 shows that the difference in the average angles for the two groups of complexes were statistically insignificant, thus confirming that the D:D interface structures most likely represent the “biological” contacts rather than “crystal” contacts. It is noteworthy that the flexibility of the D-D junction is substantially weaker than the bendability of the hinge regions in the fibrin(ogen) coiled coils, which are capable of forming kinks (Brown et al., 2000; Köhler et al., 2015).

The computational reconstruction of single-stranded fibrinogen oligomers and the structural analysis of D:D interfaces was based on resolved structures of human fibrin(ogen) and its fragments (Table S1). Using molecular structure alignment followed by Monte Carlo docking with subsequent energy minimization, we identified persistent intermolecular contacts at the D:D junction forming a pivotal point around which the angle fluctuations occur (Figures 2E and 2F). To select the functionally important interatomic contacts, we applied an 8 Å cutoff between any two  $C_\alpha$ -atoms, which is a standard definition of “native contacts” between amino acids (Mickler et al., 2007; Zhmurov et al., 2010) from the  $\sim 7$ –9 Å range commonly used. We found that, depending on the structure, there are 20–30 native contacts stabilizing the interface. The number of interfacial contacts was larger for the bent configuration of D-D complex compared with the straight configuration. This finding suggests that the D:D interface has a propensity for bending, a characteristic which might be crucial for the mechanism of protofibril twisting during the formation of fibrin fibers (Weisel et al., 1987). Analysis of the D:D contacts allowed us to identify and characterize the hinge, which is localized to residues  $\gamma$ Ala279–Tyr280 in one fragment of D and residues  $\gamma$ Asn308–Gly309 in the other. Interestingly, point mutations in these same residue positions, namely mutations in residues  $\gamma$ Ala279,  $\gamma$ Tyr280,  $\gamma$ Asn308, and  $\gamma$ Gly309, which facilitate the D-D interactions, are also implicated in a number of dysfibrinogenemias with impaired fibrin formation (Table S2; Hanss and Biot, 2001).

To recreate complete models of two-stranded fibrin oligomers, we used crystallographic information about the fibrin(ogen) molecules, structural analysis of contacts observed in fibrin(ogen)-derived fragments and complexes, geometric constraints due to the non-covalent knob-hole bonds, and MD simulations-based molecular modeling of unresolved unstructured parts bearing

highly specific binding sites, such as knobs ‘A’ and ‘B’. Following in silico reconstruction of missing portions of the fibrin molecule, we also modeled the A-a and B-b knob-hole interactions (Figures 3 and 5). The 3D arrangements revealed by reconstructed N-terminal portions of the  $\alpha$  and  $\beta$  chains (knobs ‘A’ and ‘B’ and their tethers) have provided spatial constraints necessary to build the D:E:D interface, the key structural determinant of double-stranded fibrin arrangement that holds the two strands together. Although during formation of fibrin fibers B-b interactions can occur either within or between the protofibrils (Moskowitz and Budzynski, 1994; Weisel, 2007), here we satisfied all the intra-chain B-b knob-hole bonds to arrive at the most complete structure of fibrin oligomers. Irrespective of the potential significance of B-b interactions (Weisel and Litvinov, 2013), the N $\beta$  region that contains knob ‘B’ is long enough to allow the B-b bond formation within the D-E-D complex and between fibrin strands without any steric clashes (Medved and Weisel, 2009; Figures 5 and S4). We did not add the  $\alpha$ C region into our structures because this part of about 400 residues is highly unstructured, which makes its computational reconstruction a separate difficult task. Most importantly, the  $\alpha$ C regions are not directly involved in the formation of short oligomers at the early stages of polymerization (Weisel and Litvinov, 2013), and so their presence or absence would not affect the structure of D:E or D:D interfaces. Nevertheless, given the functional importance of the  $\alpha$ C regions at the later stages of fibrin polymerization, their reconstruction would be essential to study more complex fibrin structures and their properties. Importantly, all the atomic structures of double-stranded fibrin oligomers reported here were validated by high-resolution AFM imaging of fibrin oligomers (Figure S3).

The very good agreement between the experimentally determined and theoretically predicted intermolecular dimensions of double-stranded fibrin oligomers that we have demonstrated has enabled us to characterize in atomic detail the D:E interface, including the newly resolved binding sites beyond the knob ‘A’-hole ‘a’ associations. Our previous single-molecule experiments on the forced dissociation of the knob-hole bonds revealed  $\sim 6$ -fold stronger dissociation forces for the A-a knob-hole bonds compared with the B-b knob-hole bonds (Litvinov et al., 2005, 2007), but in our MD simulation studies these forces were found to be roughly equal (Kononova et al., 2013). We hypothesized that this disagreement was due to our modeling of knob ‘A’ using the GPR motif at the N termini of the  $\alpha$  chains, whereas in experiments the A:a binding interface can extend beyond the GPR motif (Figure 5B). Our results fully confirm this hypothesis and show that the reconstructed N-terminal parts of fibrin’s  $\alpha$  chains ( $\alpha$ 17–26) and  $\beta$  chains ( $\beta$ 16–57) indeed form additional intermolecular binding sites besides the terminal N-terminal tripeptides (knobs) known to fit into small complementary holes.

The algorithm of reconstructing fibrin oligomers used in this work is somewhat different from the sequence of events during natural fibrin polymerization. In particular, the initial driving force of real fibrin polymerization is the A-a knob-hole interaction, while the end-to-end D-D interaction used here as the initial step to connect fibrin monomers is secondary to the half-staggered lateral association of fibrin molecules mediated by the knob-hole bonds between the D and E regions. There are at least three arguments that justify the approach used in this paper.

First, the D-D bonds and the D:D interfaces are real and physiologically important, as gleaned, e.g., from the mutations in the D:D interface that affect fibrin formation and properties (Hanss and Biot, 2001). Second, the A-a knob-hole bonds are formed by the crystallographically unresolved flexible N terminus of the  $\alpha$  chain (knob 'A'), meaning that there is no initial structural information to model fibrin assembly starting with the A-a knob-hole interactions. Therefore, the N terminus of the  $\alpha$  chain bearing knob 'A' was reconstructed computationally using the spatial constraints provided by the D-E-D complex formed based on the known crystal D-D structures and the GPRP peptide (knob 'A' mimetic) associated with fragments D or D-dimer. This approach can be named generally as "moving from known to unknown" while reconstructing the full-atom structures of fibrin oligomers. We would certainly have arrived at very similar results had we started with the knob-hole interactions, provided we had had the initial information necessary to model them, because the spatial limitations in the D-E-D complex are quite stringent. Third, the final structures of fibrin oligomers reconstructed in silico are in very good agreement with fibrin oligomers visualized experimentally using AFM (Figures 2, 4, and S3) or transmission electron microscopy (Fowler et al., 1981).

There is an ongoing debate about whether the factor XIIIa-mediated  $\gamma$ - $\gamma$  crosslinking between fibrin monomers occurs longitudinally (i.e., within a strand) or transversely (between the strands of a protofibril) (Weisel, 2004a, 2004b; Mosesson, 2004a, 2004b). The topology of the D:D interface and the spatial constraints in our two-stranded models of fibrin oligomers strongly support the longitudinal  $\gamma$ - $\gamma$  crosslinking for the following reasons. The  $\gamma$ - $\gamma$  crosslinks connect the C-terminal parts of two  $\gamma$  chains, namely residues  $\gamma$ Arg398/399 and  $\gamma$ Lys406. The C-terminal part of the  $\gamma$  chain is unstructured downstream to residue  $\gamma$ Asn390. There are nine residues between  $\gamma$ Asn390 and  $\gamma$ Arg399, seven residues between  $\gamma$ Arg399 and  $\gamma$ Lys406, and nine residues between  $\gamma$ Asn399 and  $\gamma$ Asn390 of the other  $\gamma$  chain. Taking the value of 3.8 Å for a fully extended amino acid length and, hence, the value of 18 Å for the length of  $\gamma$ Arg399- $\gamma$ Lys406  $\gamma$ - $\gamma$  bond, the contour length of the crosslinked  $\gamma$  chains connecting two  $\gamma$ Asn390 residues is estimated to be  $\sim$ 113 Å. Using our two-stranded fibrin protofibril structure, we found the distances between residues  $\gamma$ Asn390 in the two  $\gamma$ -nodules located in different strands to be  $\sim$ 230 Å, i.e., 2 $\times$  farther than a fully extended polypeptide chain can span. This suggests that the transverse  $\gamma$ - $\gamma$  crosslinking is not feasible without substantial elongation of the  $\gamma$ -nodules, which is potentially possible provided that elongation of the  $\gamma$  chain due to the C-terminal  $\beta$  strand pull out occurs. According to this "pull-out" hypothesis, the C-terminal  $\beta$  strand of the  $\gamma$  chain (residues  $\gamma$ Lys381-Asn390) can be drawn out of the  $\gamma$ -nodule without much perturbation of its native fold (Yakovlev et al., 2000). Consequently, the  $\beta$  strand can extend outwards, increasing the reach of the  $\gamma$ - $\gamma$  crosslinks. We calculated the contour length of the two crosslinked  $\gamma$  chains between  $\gamma$ Lys381 residues to be  $\sim$ 180 Å, while the shortest distance between two  $\gamma$ Lys381 residues in our structures is  $\sim$ 200 Å. This means that even if both  $\beta$  strands are pulled out from two crosslinked  $\gamma$ -nodules and the polypeptide chains forming the  $\gamma$ - $\gamma$  crosslinks are fully extended, the  $\gamma$ -nodules from two different strands are still too far apart. This type of crosslinking would require additional residues (i.e.,  $\gamma$ Met379-Lys380) to be

pulled out from the  $\gamma$ -nodule, but the removal of these residues might also cause the dissociation of A-a knob-hole bonds because these residues are close to hole 'a'.

These results provide additional insights into the molecular mechanisms of fibrin formation. Many functionally important intermolecular contacts identified and quantitatively characterized here have never been described hitherto, while they drive fibrin oligomerization. Apart from the known A-a and B-b knob-hole bonds, the flexible interfaces described in this paper are formed due to D-D interactions as well as D:E:D contacts. Importantly, the functional significance of these intermolecular juncture sites was validated by quantitative comparison with corresponding naturally occurring genetic mutations that cause impaired fibrin formation (Table S2). Information about these contacts could never be gleaned from sequence analysis alone without the step-by-step 3D spatial reconstruction of fibrin(ogen) folded domains, and the subsequent equilibration and analysis of their tertiary and quaternary structures performed in this study.

To conclude, the atomic models reconstituted computationally in this work and validated experimentally present a significant development necessary for the structure-based understanding of unique biochemical and material properties of fibrin polymers. Atomic models of fibrin oligomers and protofibrils are available for downloading in the PDB format for atomic coordinates at <http://faculty.uml.edu/vbarsegov/research/fibrin.html>.

## EXPERIMENTAL PROCEDURES

### Formation of Crosslinked Fibrinogen Oligomers

To induce end-to-end (D-D) oligomerization of fibrinogen molecules, 10 mg/mL human fibrinogen (HYPHEN BioMed) in 20 mM Tris-HCl buffer (pH 7.4) containing 150 mM NaCl, 30 mM CaCl<sub>2</sub>, and 5 ATU/mL hirudin (Sigma) was mixed with pre-activated human factor XIIIa (Enzyme Research Laboratories) at 50  $\mu$ g/mL (final concentration) at 37°C. Aliquots were taken at various time points and the crosslinking reaction was stopped by dilution and boiling the aliquots in sample buffer with 100 mM DTT, 2% SDS. The reduced samples were run on a 10% SDS-PAGE gel followed by staining with Coomassie blue R-250 (Figure S5A). The covalent crosslinking of fibrinogen molecules via the C termini of the  $\gamma$  chains was corroborated by the appearance of the  $\gamma$ -dimer band in SDS-PAGE of reduced samples. A fine  $\gamma$ -dimer band was visible 1 min after addition of factor XIIIa, became more pronounced at 3 min, and reached a maximum at 15 min. To obtain a solution of fibrinogen oligomers for AFM imaging, the factor XIIIa-catalyzed cross-linking was stopped with iodoacetamide (2 mM final concentration) at the beginning of gelation ( $\sim$ 60 min) and the nascent gel was removed. The soluble fraction of monomeric and oligomeric fibrinogen that was not incorporated into the gel was diluted 2,000-fold (to about 1–3  $\mu$ g/mL) with 20 mM Tris-HCl buffer (pH 7.4) containing 150 mM NaCl, 10 mM CaCl<sub>2</sub>, and 2 mM iodoacetamide.

### Formation of Double-Stranded Fibrin Oligomers

Human fibrinogen (3  $\mu$ g/mL) in 20 mM Tris-HCl buffer (pH 7.4) containing 150 mM NaCl and 10 mM CaCl<sub>2</sub> was mixed with 0.05 U/mL thrombin (final concentration), incubated for 15–20 min at room temperature and immediately used for AFM imaging. Short double-stranded fibrin oligomers and longer protofibrils were predominantly obtained with this sample preparation protocol. Covalent crosslinking of these fibrin structures was ensured by formation of the  $\gamma$ -dimer bands in SDS-PAGE (Figure S5B).

### AFM

AFM imaging of fibrinogen or fibrin oligomers was performed on the surface of modified hydrophilized graphite (Klinov et al., 2007; Protopenova et al., 2015). Three microliters of a sample solution prepared as described above was applied on the modified graphite surface and kept for 15 s at room



temperature. A  $\sim 50\times$  volume drop of fresh Milli-Q water was then carefully placed above the sample solution for 10 s and then removed with a flow of air making the surface ready for imaging. The AFM imaging was performed using a MFP-3D microscope (Asylum Research - Oxford Instruments) in AC mode with a typical scan rate of 0.8 Hz. Images were taken in air using SSS-SEIHR cantilevers (Nanosensors) with a tip radius of  $3 \pm 2$  nm. FemtoScan Online software (<http://www.femtoscannonline.com>) was used to filter and analyze the AFM data.

### Computational Reconstruction of Short Fibrin Oligomers

The following steps 1–3 (Figure 3A) were used to construct the atomic structures of double-stranded fibrin oligomer FO<sub>2/3</sub> and the D-E-D construct. Steps 1–3 are described in more detail in Supplemental Information. In short, step 1 is a reconstitution of single-stranded dimer (Fg<sub>2</sub>) and trimer (Fg<sub>3</sub>) with the Kabsch rotation algorithm applied to known structures of the full-length fibrinogen molecule and the D:D interface. In step 2, the structures of Fg<sub>2</sub> and Fg<sub>3</sub> were used in conjunction with Monte Carlo docking to obtain fragment FO<sub>2/3</sub>. We performed 20 Monte Carlo runs both for the bent and straight conformations of the D-D junction, but none of the runs for the bent conformation converged to a structure with all eight constraints satisfied. By contrast, the Monte Carlo runs with the straight conformation showed a very good convergence, with 14 of 20 final structures having all eight constraints satisfied. In step 3, we incorporated the missing parts of fibrin molecules, followed by the energy minimization of the obtained complete structure of FO<sub>2/3</sub>. The structure of the D-E-D construct was obtained from the structure of FO<sub>2/3</sub> (Figures 3 and 5).

### Atomic Models of the D-E-D Complex

We used the energy-minimized structure of FO<sub>2/3</sub> to extract complexes  $\gamma$ -E- $\gamma$  and D-E-D (Figures 3D and 5). The  $\gamma$ -E- $\gamma$  complex contains residues  $\gamma$ Lys140-Lys411 in the  $\gamma$ -nodules to represent adjacent D regions and residues  $\alpha$ Gly17-Phe74,  $\beta$ Arg57-Val104, and  $\gamma$ Tyr1-Gln49 in the E region. The D-E-D complex contained residues  $\alpha$ Leu119-Gln200,  $\beta$ Asp154-Gln461, and  $\gamma$ Glu91-Val411 in the D regions and residues  $\alpha$ Gly17-Lys123,  $\beta$ Gly15-Asn158, and  $\gamma$ Tyr1-Lys95 in the E region. Two Ca<sup>2+</sup> ions were added to  $\gamma$ -E- $\gamma$  and D-E-D. In the  $\gamma$ -E- $\gamma$  complex, the atoms of active sequence GPR ( $\alpha$ Gly17-Arg19) in knob 'A' were placed at positions of corresponding atoms in the GPRP peptide co-crystallized with fibrinogen. In the D-E-D complex, knobs 'A' and 'B' were placed at the position of the GPR and GHR residues of the corresponding synthetic peptides. The MD simulations were performed as described in Supplemental Information.

### SUPPLEMENTAL INFORMATION

Supplemental Information includes Supplemental Experimental Procedures, five figures, two tables, and three 3D molecular models and can be found with this article online at <http://dx.doi.org/10.1016/j.str.2016.08.009>.

### AUTHOR CONTRIBUTIONS

A.Z., P.Z., and V.B. performed computational reconstruction of the atomic models; A.D.P., A.R.M., R.I.L., and J.W.W. carried out the AFM experiments; A.Z. and A.D.P. statistically analyzed the data; A.Z., R.I.L., J.W.W., and V.B. designed the research and wrote the paper.

### ACKNOWLEDGMENTS

We thank Dr. Leonid Medved for valuable comments and Dr. Dmitry Klinov for providing a graphite modifier. This work was supported by American Heart Association grants 15GRNT23150000 and 13GRNT16960013, NIH grants HL090774 and U01-HL116330, NSF grant DMR 1505662, Russian Foundation for Basic Research grants 15-01-06721A and 15-37-21027, and by the Program for Competitive Growth at Kazan Federal University.

Received: May 16, 2016

Revised: July 19, 2016

Accepted: August 10, 2016

Published: September 29, 2016

### REFERENCES

- Blomback, B., Procyk, R., Adamson, L., and Hessel, B. (1985). FXIII induced gelation of human fibrinogen – an alternative thiol enhanced, thrombin independent pathway. *Thromb. Res.* 37, 613–627.
- Bowley, S.R., and Lord, S.T. (2009). Fibrinogen variant B $\beta$ D432A has normal polymerization but does not bind knob 'B'. *Blood* 113, 4425–4430.
- Brown, J.H., Volkmann, N., Jun, G., Henschen-Edman, A.H., and Cohen, C. (2000). The crystal structure of modified bovine fibrinogen. *Proc. Natl. Acad. Sci. USA* 97, 85–90.
- Brown, A.E.X., Litvinov, R.I., Discher, D.E., and Weisel, J.W. (2007). Forced unfolding of coiled-coils in fibrinogen by single-molecule AFM. *Biophys. J.* 92, L39–L41.
- Everse, S.J., Spraggon, G., Veerapandian, L., Riley, M., and Doolittle, R.F. (1998). Crystal structure of fragment double-D from human fibrin with two different bound ligands. *Biochemistry* 37, 8637–8642.
- Fowler, W.E., Hantgan, R.R., Hermans, J., and Erickson, H.P. (1981). Structure of the fibrin protofibril. *Proc. Natl. Acad. Sci. USA* 78, 4872–4876.
- Hanss, M., and Biot, F. (2001). A database for human fibrinogen variants. *Ann. N.Y. Acad. Sci.* 936, 89–90.
- Hantgan, R., Fowler, W., Erickson, H., and Hermans, J. (1980). Fibrin assembly: a comparison of electron microscopic and light scattering results. *Thromb. Haemost.* 44, 119–124.
- Hirota-Kawadobora, M., Terasawa, F., Suzuki, T., Tozuka, M., Sano, K., and Okumura, N. (2004). Comparison of thrombin-catalyzed fibrin polymerization and factor XIIIa-catalyzed cross-linking of fibrin among three recombinant variant fibrinogens, Gamma275C, Gamma275H, and Gamma275A. *J. Thromb. Haemost.* 2, 1359–1367.
- Köhler, S., Friederike, S., and Giovanni, S. (2015). The internal dynamics of fibrinogen and its implications for coagulation and adsorption. *PLoS Comput. Biol.* 11, e1004346.
- Kollman, J.M., Pandi, L., Sawaya, M.R., Riley, M., and Doolittle, R.F. (2009). Crystal structure of human fibrinogen. *Biochemistry* 48, 3877–3886.
- Kononova, O., Litvinov, R.I., Zhmurov, A., Alekseenko, A., Cheng, C.H., Agarwal, S., Marx, K., Weisel, J.W., and Barsegov, V. (2013). Molecular mechanisms, thermodynamics and dissociation kinetics of knob-hole interactions in fibrin. *J. Biol. Chem.* 288, 22681–22692.
- Kostelansky, M.S., Betts, L., Gorkun, O.V., and Lord, S.T. (2002). 2.8Å crystal structures of recombinant fibrinogen fragment D with and without two peptide ligands: GHRP binding to the 'b' site disrupts its nearby calcium-binding site. *Biochemistry* 41, 12124–12132.
- Klinov, D., Dwir, B., Kapon, E., Borovok, N., Molotsky, T., and Kotlyar, A. (2007). High-resolution atomic force microscopy of duplex and triplex DNA molecules. *Nanotechnology* 18, 225102.
- Laudano, A.P., and Doolittle, R.F. (1978). Synthetic peptide derivatives that bind to fibrinogen and prevent the polymerization of fibrin monomers. *Proc. Natl. Acad. Sci. USA* 75, 3085–3089.
- Litvinov, R.I., Gorkun, O.V., Owen, S.F., Shuman, H., and Weisel, J.W. (2005). Polymerization of fibrin: specificity, strength, and stability of knob-hole interactions studied at the single-molecule level. *Blood* 106, 2944–2951.
- Litvinov, R.I., Gorkun, O.V., Galanakis, D.K., Yakovlev, S., Medved, L., Shuman, H., and Weisel, J.W. (2007). Polymerization of fibrin: direct observation and quantification of individual B:b knob-hole interactions. *Blood* 109, 130–138.
- Lorand, L., and Conrad, S.M. (1984). Transglutaminases. *Mol. Cell. Biochem.* 58, 9–35.
- Marchi, R.C., Carvajal, Z., Boyer-Neumann, C., Anglés-Cano, E., and Weisel, J.W. (2006). Functional characterization of fibrinogen Bicetre II: a gamma 308 Asn->Lys mutation located near the fibrin D: D interaction sites. *Blood Coagul. Fibrinolysis* 17, 193–201.
- Medved, L., and Weisel, J.W. (2009). Recommendations for nomenclature on fibrinogen and fibrin. *J. Thromb. Haemost.* 7, 355–359.

- Medved, L., Ugarova, T., Veklich, Y., Lukinova, N., and Weisel, J.W. (1990). Electron microscope investigation of the early stages of fibrin assembly. Twisted protofibrils and fibers. *J. Mol. Biol.* *216*, 503–509.
- Mickler, M., Dima, R.I., Dietz, H., Hyeon, C., Thirumalai, D., and Rief, M. (2007). Revealing the bifurcation in the unfolding pathways of GFP by using single-molecule experiments and simulations. *Proc. Natl. Acad. Sci. USA* *104*, 20268–20273.
- Mosesson, M.W. (2004a). The fibrin cross-linking debate: cross-linked  $\gamma$ -chains in fibrin fibrils bridge 'transversely' between strands: yes. *J. Thromb. Haemost.* *2*, 388–393.
- Mosesson, M.W. (2004b). Cross-linked  $\gamma$ -chains in a fibrin fibril are situated transversely between its strands. *J. Thromb. Haemost.* *2*, 1469–1471.
- Moskowitz, K.A., and Budzynski, A.Z. (1994). The (DD)E complex is maintained by a composite fibrin polymerization site. *Biochemistry* *33*, 12937–12944.
- Pratt, K.P., Cote, H.C.F., Chung, D.W., Stenkamp, R.E., and Davie, E.W. (1997). The primary fibrin polymerization pocket: three-dimensional structure of a 30-kDa C-terminal  $\gamma$  chain fragment complexed with the peptide Gly-Pro-Arg-Pro. *Proc. Natl. Acad. Sci. USA* *94*, 7176–7181.
- Protopopova, A.D., Barinov, N.A., Zavyalova, E.G., Kopylov, A.M., Sergienko, V.I., and Klinov, D.V. (2015). Visualization of fibrinogen  $\alpha$ C regions and their arrangement during fibrin network formation by high-resolution AFM. *J. Thromb. Haemost.* *13*, 570–579.
- Weisel, J.W. (2004a). Cross-linked  $\gamma$ -chains in fibrin fibrils bridge transversely between strands: no. *J. Thromb. Haemost.* *2*, 394–399.
- Weisel, J.W. (2004b). Cross-linked  $\gamma$ -chains in a fibrin fibril are situated transversely between its strands. *J. Thromb. Haemost.* *2*, 1467–1469.
- Weisel, J.W. (2005). Fibrinogen and fibrin. *Adv. Protein Chem.* *70*, 247–299.
- Weisel, J.W. (2007). Which knobs fit into which holes in fibrin polymerization? *J. Thromb. Haemost.* *5*, 2340–2343.
- Weisel, J.W., and Litvinov, R.I. (2013). Mechanisms of fibrin polymerization and clinical implications. *Blood* *121*, 1712–1719.
- Weisel, J.W., Nagaswami, C., and Makowski, L. (1987). Twisting of fibrin fibers limits their radial growth. *Proc. Natl. Acad. Sci. USA* *84*, 8991–8995.
- Weisel, J.W., Francis, C.W., Nagaswami, C., and Marder, V.J. (1993). Determination of the topology of factor XIIIa-induced fibrin gamma-chain cross-links by electron microscopy of ligated fragments. *J. Biol. Chem.* *268*, 26618–26624.
- Yakovlev, S., Litvinovich, S., Loukinov, D., and Medved, L. (2000). Role of the  $\beta$ -strand insert in the central domain of the fibrinogen  $\gamma$ -module. *Biochemistry* *39*, 15721–15729.
- Yang, Z., Pandi, L., and Doolittle, R.F. (2002). The crystal structure of fragment double-D from cross-linked lamprey fibrin reveals isopeptide linkages across an unexpected DD interface. *Biochemistry* *41*, 15610–15617.
- Yeh, M.S., Chen, Y.L., and Tsai, I.H. (1998). The hemolymph clottable proteins of tiger shrimp, *Penaeus monodon*, and related species. *Comp. Biochem. Phys. B* *121*, 169–176.
- Zhmurov, A., Dima, R.I., Kholodov, Y., and Barsegov, V. (2010). SOP-GPU: Accelerating biomolecular simulations in the centisecond timescale using graphics processors. *Proteins* *78*, 2984–2999.
- Zhmurov, A., Brown, A.E.X., Litvinov, R.I., Dima, R.I., Weisel, J.W., and Barsegov, V. (2011). Mechanism of fibrin (ogen) forced unfolding. *Structure* *19*, 1615–1624.
- Zhmurov, A., Kononova, O., Litvinov, R.I., Dima, R.I., Barsegov, V., and Weisel, J.W. (2012). Mechanical transition from  $\alpha$ -helical coiled coils to  $\beta$ -sheets in fibrin(ogen). *J. Am. Chem. Soc.* *134*, 20396–20402.

**Structure, Volume 24**

**Supplemental Information**

**Structural Basis of Interfacial Flexibility  
in Fibrin Oligomers**

**Artem Zhmurov, Anna D. Protopopova, Rustem I. Litvinov, Pavel Zhukov, Alexander R. Mukhitov, John W. Weisel, and Valeri Barsegov**



**SUPPLEMENTAL TABLES**

**Table S1. Related to Figure 2.** Crystal structures of human fibrinogen, fibrin, and their fragments from PDB used in the reconstruction of fibrin oligomers.

| <b>PDB codes</b>                                                                    | <b>Structures</b>                                             | <b>References</b>         |
|-------------------------------------------------------------------------------------|---------------------------------------------------------------|---------------------------|
| <i>Fibrinogen</i>                                                                   |                                                               |                           |
| 3GHG                                                                                | Human fibrinogen co-crystallized with GPRP and GHRP           | Kollman et al., 2009      |
| <i>D-dimer fragments from crosslinked fibrin</i>                                    |                                                               |                           |
| 1FZB                                                                                | Crosslinked double D fragment                                 | Spraggon et al., 1997     |
| 1FZC                                                                                | Fragment double-D from human fibrin with bound ligands        | Everse et al., 1998       |
| 1FZE                                                                                | Fragment double-D from human fibrin                           | Everse et al., 1999       |
| 1FZF                                                                                | Fragment double-D from human fibrin with GHRP                 | Everse et al., 1999       |
| 1N86                                                                                | Human D-dimer from cross-linked fibrin with GPR and GHRPLDK   | Yang et al., 2002         |
| 1N8E                                                                                | Fragment double-D from human fibrin                           | Yang et al., 2002         |
| 2HLO                                                                                | Fragment D-dimer from human fibrin with G-hydroxyP-RP         | no reference              |
| 2HOD                                                                                | Fragment D-dimer from human fibrin with G-hydroxyP-RP         | no reference              |
| 2HPC                                                                                | Fragment D-dimer from human fibrin with GPRP                  | no reference              |
| 2Q9I                                                                                | D-dimer from human fibrin with MHRPY                          | Doolittle and Pandi, 2007 |
| 2Z4E                                                                                | D-dimer from human fibrin with GHRPY                          | Pandi et al., 2009        |
| 3H32                                                                                | D-dimer from human fibrin with GHRPY                          | Pandi et al., 2009        |
| <i>Fragments D (D-D interactions in a crystal as a result of molecular packing)</i> |                                                               |                           |
| 1FZG                                                                                | Fragment D from human fibrinogen with GHRP                    | Everse et al., 1999       |
| 2H43                                                                                | Fragment D co-complexed with AHRP                             | Doolittle et al., 2006    |
| 2FFD                                                                                | Fibrinogen fragment D with GPRVVE                             | Betts et al., 2006        |
| 3BVH                                                                                | Recombinant $\gamma$ D364A fibrinogen fragment D with GPRP    | Bowley et al., 2008       |
| 3E1I                                                                                | B $\beta$ D432A variant fibrinogen fragment D with GHRP       | Bowley and Lord, 2009     |
| 2OYH                                                                                | Fragment D of $\gamma$ D298,301A fibrinogen variant with GHRP | Kostelansky et al., 2007  |
| 2OYI                                                                                | Fragment D of $\gamma$ D298,301A fibrinogen variant with GHRP | Kostelansky et al., 2007  |
| 1LT9                                                                                | Recombinant human fibrinogen fragment D                       | Kostelansky et al., 2002  |
| 1LTJ                                                                                | Recombinant human fibrinogen fragment D with GPRP and GHRP    | Kostelansky et al., 2002  |
| 1FZA                                                                                | Fibrinogen fragment D                                         | Spraggon et al., 1997     |
| 1RE3                                                                                | Fragment D of B $\beta$ D398A fibrinogen variant with GHRP    | Kostelansky et al., 2004  |
| 1RE4                                                                                | Fragment D of B $\beta$ D398A variant fibrinogen              | Kostelansky et al., 2004  |
| 1RF1                                                                                | Fragment D of $\gamma$ E132A fibrinogen variant with GHRP     | Kostelansky et al., 2004  |
| 1RF0                                                                                | Fragment D of $\gamma$ E132A fibrinogen variant               | Kostelansky et al., 2004  |

**Table S2. Related to Figure 5. Naturally occurring fibrinogen mutations and their relation to the inter-residue contacts in the D:E:D interface:** Binary contacts between amino acid residues in the D-D structures and in the central E region resolved by the X-ray crystallography. Only residues with known natural fibrinogen variants containing corresponding point mutations are listed. The molecular characteristics of fibrinogen variants are taken from GEHT database (Hanss and Biot, 2001).

| <b>Residue in the D:D interface identified in this study</b> | <b>Fibrinogen variants with mutated amino acids shown in the left column</b> | <b>Corresponding reacting partner residues in the E region</b>                                                                                                                         |
|--------------------------------------------------------------|------------------------------------------------------------------------------|----------------------------------------------------------------------------------------------------------------------------------------------------------------------------------------|
| $\gamma$ Asp318                                              | →Tyr (Bastia)                                                                | B $\beta$ Lys53, B $\beta$ Arg57                                                                                                                                                       |
|                                                              | →Gly (Giessen IV)                                                            |                                                                                                                                                                                        |
|                                                              | →Val (Caen)                                                                  |                                                                                                                                                                                        |
| $\gamma$ Asn319                                              | →Lys                                                                         | B $\beta$ Arg57                                                                                                                                                                        |
|                                                              | →deleted (Hannover)                                                          |                                                                                                                                                                                        |
| $\gamma$ Asp320                                              | →deleted (Des Moines)                                                        | B $\beta$ Arg57                                                                                                                                                                        |
|                                                              | →Gly (Chinese)                                                               |                                                                                                                                                                                        |
| $\gamma$ Asn319-Asp320                                       | →deleted (Vlissingen, Frankfurt IV, Otsu)                                    | A $\alpha$ Arg23, A $\alpha$ Lys29, B $\beta$ Arg57                                                                                                                                    |
| $\gamma$ Phe322                                              | →Cys (Villeurbanne)                                                          | A $\alpha$ Val21-Ser27, A $\alpha$ Lys29, B $\beta$ Glu56-Lys58, B $\beta$ Pro60                                                                                                       |
| $\gamma$ Asn325                                              | →Ile (Krakow)                                                                | A $\alpha$ Val21-Arg23, B $\beta$ Lys53, B $\beta$ Val56-Lys58, B $\beta$ Pro70-Asp71, $\gamma$ Gln49                                                                                  |
| $\gamma$ Cys326                                              | →Ser (Cordoba, Hannover XIII)                                                | A $\alpha$ Val21, B $\beta$ Glu56                                                                                                                                                      |
|                                                              | →Tyr (Suhl, Frostburg)                                                       |                                                                                                                                                                                        |
| $\gamma$ Ala327                                              | →Thr (Tokyo V)                                                               | $\gamma$ Asp37-Lys38                                                                                                                                                                   |
| $\gamma$ Gln329                                              | →Arg (Nagoya)                                                                | A $\alpha$ Val21-Arg23, A $\alpha$ Leu54, A $\alpha$ Glu57, A $\alpha$ Phe62, A $\alpha$ Arg65, B $\beta$ Lys54, B $\beta$ Glu56-Lys58, $\gamma$ Gln49, $\gamma$ Gln33, $\gamma$ Asp37 |
| $\gamma$ Asp330                                              | →Tyr (Kyoto III)                                                             | A $\alpha$ Arg65, $\gamma$ Asp37, $\gamma$ Gln41                                                                                                                                       |
|                                                              | →Val (Ales, Milano)                                                          |                                                                                                                                                                                        |
| $\gamma$ Asn337                                              | →Lys (Bern)                                                                  | A $\alpha$ Glu22-Gln25                                                                                                                                                                 |
| $\gamma$ Gln350                                              | not documented                                                               | A $\alpha$ Lys68-Leu69, A $\alpha$ Leu73                                                                                                                                               |
| $\gamma$ Gly351                                              | →14 aa (Paris)                                                               | A $\alpha$ Lys68                                                                                                                                                                       |
|                                                              | →Ser (Praha, Leipzig II)                                                     |                                                                                                                                                                                        |
| $\gamma$ Gly352                                              | →Cys (Ilam)                                                                  | A $\alpha$ Lys68                                                                                                                                                                       |
| $\gamma$ Thr353                                              | →Pro (Ilam)                                                                  | A $\alpha$ Lys68                                                                                                                                                                       |
| $\gamma$ Asn361                                              | →Lys (Poissy II)                                                             | A $\alpha$ Val21-Arg23, B $\beta$ Val56-Arg57                                                                                                                                          |
| $\gamma$ Tyr363                                              | →Asn (Praha III)                                                             | A $\alpha$ Val21-Arg23, B $\beta$ Val56-Arg57                                                                                                                                          |
| $\gamma$ Asp364                                              | →His (Matsumoto)                                                             | A $\alpha$ Val21                                                                                                                                                                       |
|                                                              | →Val (Melun)                                                                 |                                                                                                                                                                                        |
| $\gamma$ Arg375                                              | →Gly (Osaka V)                                                               | A $\alpha$ Val21                                                                                                                                                                       |
|                                                              | →Trp (Aguadilla, Geneva, Italian, San Diego, Japanese)                       |                                                                                                                                                                                        |

## SUPPLEMENTAL FIGURES

### Figure S1. Complementary to Figure 2. Flexibility of the D-dimers

(A and B) Comparison of D-D interfacial contacts found in naturally formed D-dimers (A) with those reported as crystal contacts (B). Both sets have similar variations in the bending angle formed by two fibrin(ogen) monomers. Two clusters of structures (named Clusters 1 and 2 in the Main Text) have been identified: Cluster 1 contains intermolecular contacts from the following PDB structures: 1N86, 2HOD, 2HPC, 3H32, and 3BVH. Cluster 2 contains contacts from the following PDB structures: 1FZB, 1FZE, 1FZF, 1N8E, 2HLO, 2Q9I, 2Z4E, 1FZG, 2H43, 3E1I, 2OYH, 2OYI, 1LT9, 1LTJ, 1FZA, 1RE3, 1RE4, 1RF1, and 1RF0. The average structures for Clusters 1 and 2 marked bold were used in our computational reconstruction.

(C) RMSF values for residues in the  $\gamma 1$  nodule relative to the  $\gamma 2$  nodule and vice versa.

(D and E) Results of Normal Mode analysis for two head-to-tail connected fibrin monomers performed with the eINemo web-interface (Suhre and Sanejouand, 2004-1; Suhre and Sanejouand, 2004-2). The equilibrium structure is shown ghosted, and the structures exemplifying the normal modes are in color (directions of motion are shown by the black arrows). Modes 7 (D) and 8 (E) represent the bending motion of fibrin dimer around the identified hinge region in the D-D interface (see Main Text).

### Figure S2. Related to Figure 3. Geometric constraints associated with knob 'A' binding to hole 'a' in the D-E-D complex

(A) Depicted are the  $\beta$ - and  $\gamma$ -nodules of two abutted fibrin monomers forming the upper strand and the E region in the lower strand. The GPRV motifs comprising the knob 'A'-containing N-terminal part of the  $\alpha$  chain (knob 'A'-mimetic peptide GPRP) are inserted into holes 'a' of the  $\gamma$ -nodules of two adjacent fibrin monomers. The first resolved residue in the  $\alpha$  chain is  $\alpha$ Ala27 in the E region. In the case of A-a interaction, the distance between position of  $\alpha$ Val20 of the GPRV motif (corresponding to position of Pro4 in the peptide GPRP) and position of  $\alpha$ Ala27 in the E region cannot exceed the contour length of the 6-mer peptide connecting the  $C_{\alpha}$  atoms of these residues. This is a 6-residue-long stretch with a contour length of  $\sim 26$ - $27$ Å.

(B) All 8 constraints (dashed red curves), which have to be simultaneously satisfied in reconstruction of FO<sub>2/3</sub>.

### Figure S3. Related to Figure 4. AFM images and atomic models of double-stranded fibrin oligomers

(A-D) The AFM images of short fibrin oligomers FO<sub>1/2</sub> (A), FO<sub>2/2</sub> (B), FO<sub>2/3</sub> (B) and longer oligomers FO<sub>4/4</sub> and FO<sub>6/6</sub> (B). Shown are the raw AFM images (top panels), AFM images with approximate positions of D and E regions (middle panels), and AFM images with superimposed *in silico* structures (bottom panels).

(E) The dynamics of D-E distances from 20 Monte Carlo docking runs (final stage of structural relaxation for each run is magnified in *the inset*). The grey area on the inset indicates the experimental range of D-E distances from AFM images.

### Figure S4. Related to Figure 5. Structures of knob 'B' bound to complementary hole 'b'

(A and B) Contiguous parts of the  $\beta$ -nodule with Ca<sup>2+</sup> and disulfide bonds, portions of the  $\alpha$ ,  $\beta$  and  $\gamma$  chains forming the triple-helical coiled coil, and carbohydrates. Panels (A) and (B) represent two possible ways for the knob 'B' to bind to the hole 'b' by routing around the carbohydrate chain, which is linked to residue  $\beta$ Asn364 in the  $\beta$ -nodule. In panel (A), knob 'B' – part of the N $\beta$  region (Medved and Weisel, 2009), directly approaches hole 'b' that is not obstructed by the carbohydrate chain. In panel (B), knob 'B' winds around the carbohydrate and approaches hole 'b' through the space between the carbohydrate and the coiled-coil region. The average potential energies of these two conformations of the B-b knob-hole complex are within their standard deviations, implying that both binding scenarios are possible. The atomic models are based on the MD simulations of atomic structures created using crystallographic data from the structure 3GHG of fibrinogen and the structure 1N86 of D:D interface (Table S1; see Data S3).

**Figure S5. Crosslinking of fibrinogen and fibrin oligomers.** SDS-PAGE in reducing conditions showing the subunit composition of fibrinogen (Fg) and fibrin (Fn) oligomers before, during, and after incubation with pre-activated factor XIIIa (see Methods).

(A) Lanes (from left to right) show control untreated fibrinogen without factor XIIIa and the crosslinking products after incubation of fibrinogen with factor XIIIa for 40 sec, 3 min, 15 min, 30 min, and 60 min. Horizontal arrows indicate the bands corresponding to the  $\gamma$ -dimers as well as the  $\alpha$ ,  $\beta$ , and  $\gamma$  subunits. The dashed vertical line between the 30-min and 60-min lanes reflects the fact that an uninformative auxiliary lane with lower protein loading has been spliced from the original gel.



(B) Lanes show fibrin oligomers formed by treating fibrinogen with thrombin in the absence (left lane) and presence of factor XIIIa activity. The  $\gamma$ -dimer band indicates covalent intermolecular crosslinking.

(C and D) Quantitative analysis of the gels shown in (A) and (B), respectively. SDS-PAGE of fibrinogen (A and C) shows only partial  $\gamma$ - $\gamma$  crosslinking because the sample contained a mixture of uncrosslinked fibrinogen monomers and short soluble crosslinked fibrinogen oligomers, while fully crosslinked insoluble fibrinogen polymers have been removed. SDS-PAGE of fibrin (B and D) shows incomplete  $\gamma$ - $\gamma$  crosslinking because of a very low fibrin(ogen) concentration (3  $\mu\text{g/ml}$ ) and a relatively short time of incubation with factor XIIIa (15-20 min).

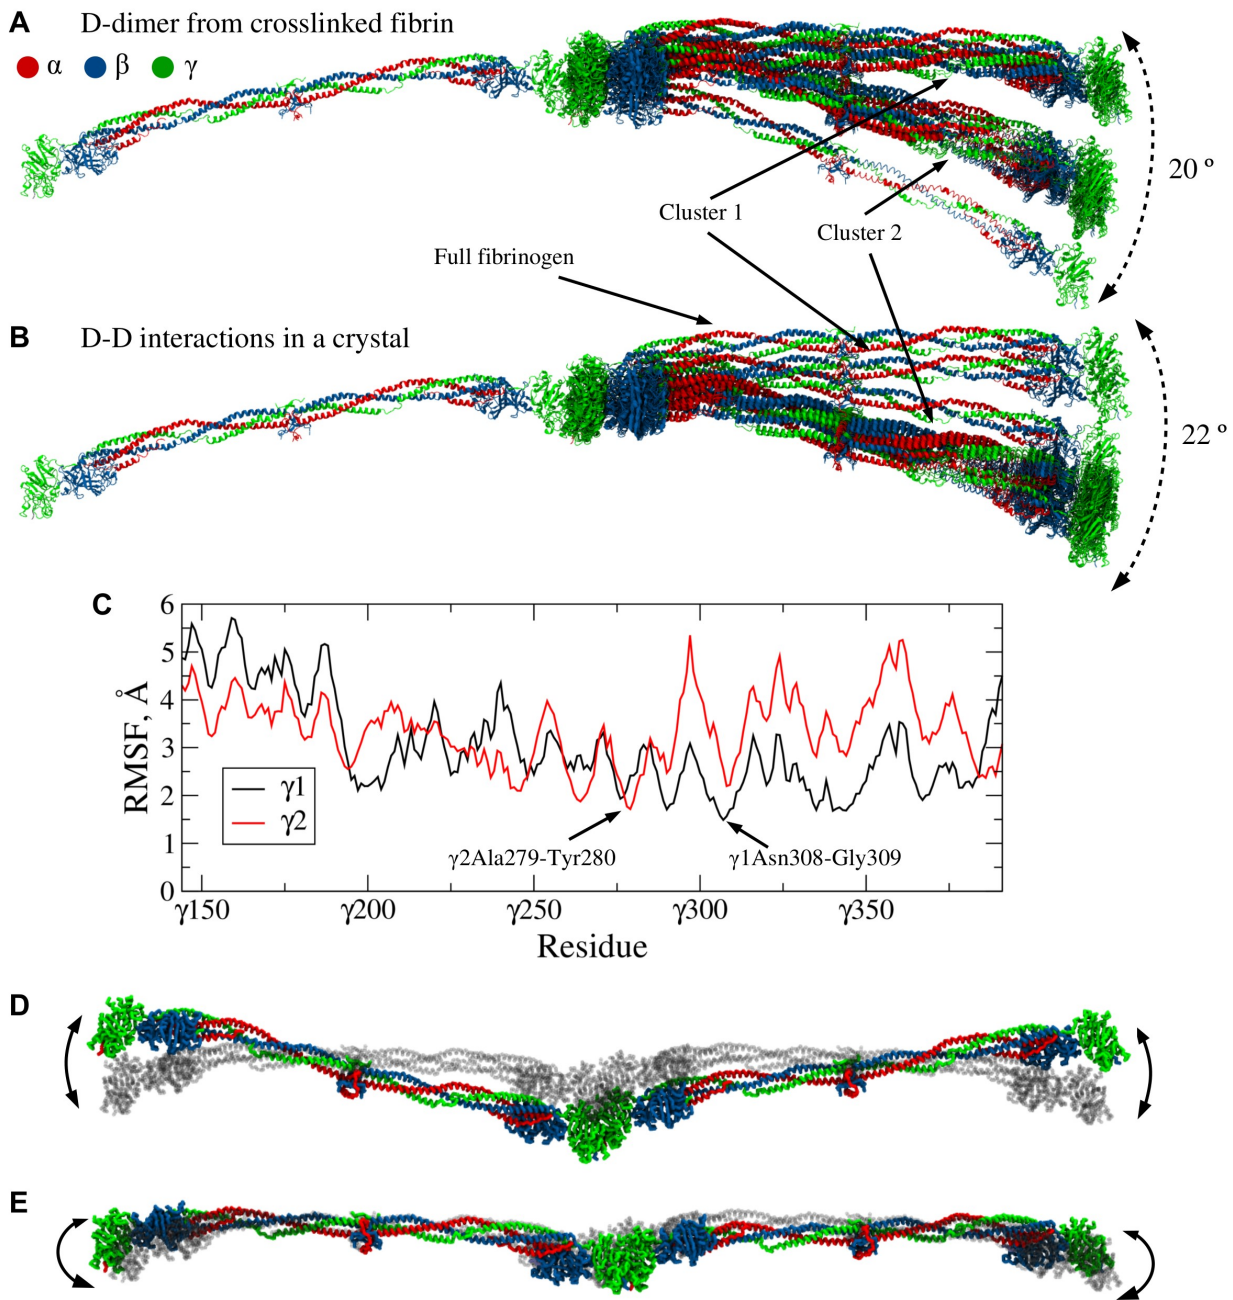

Figure S1

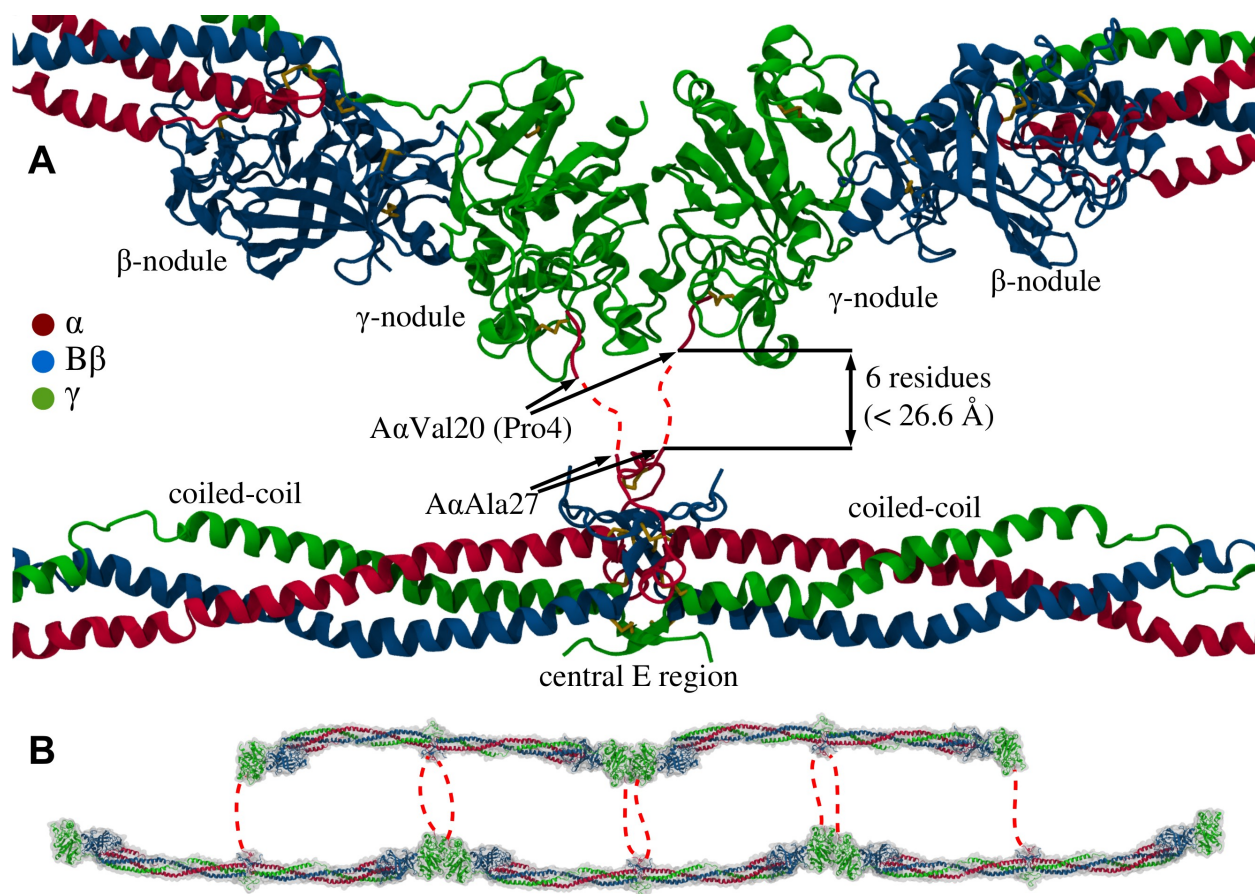

**Figure S2**



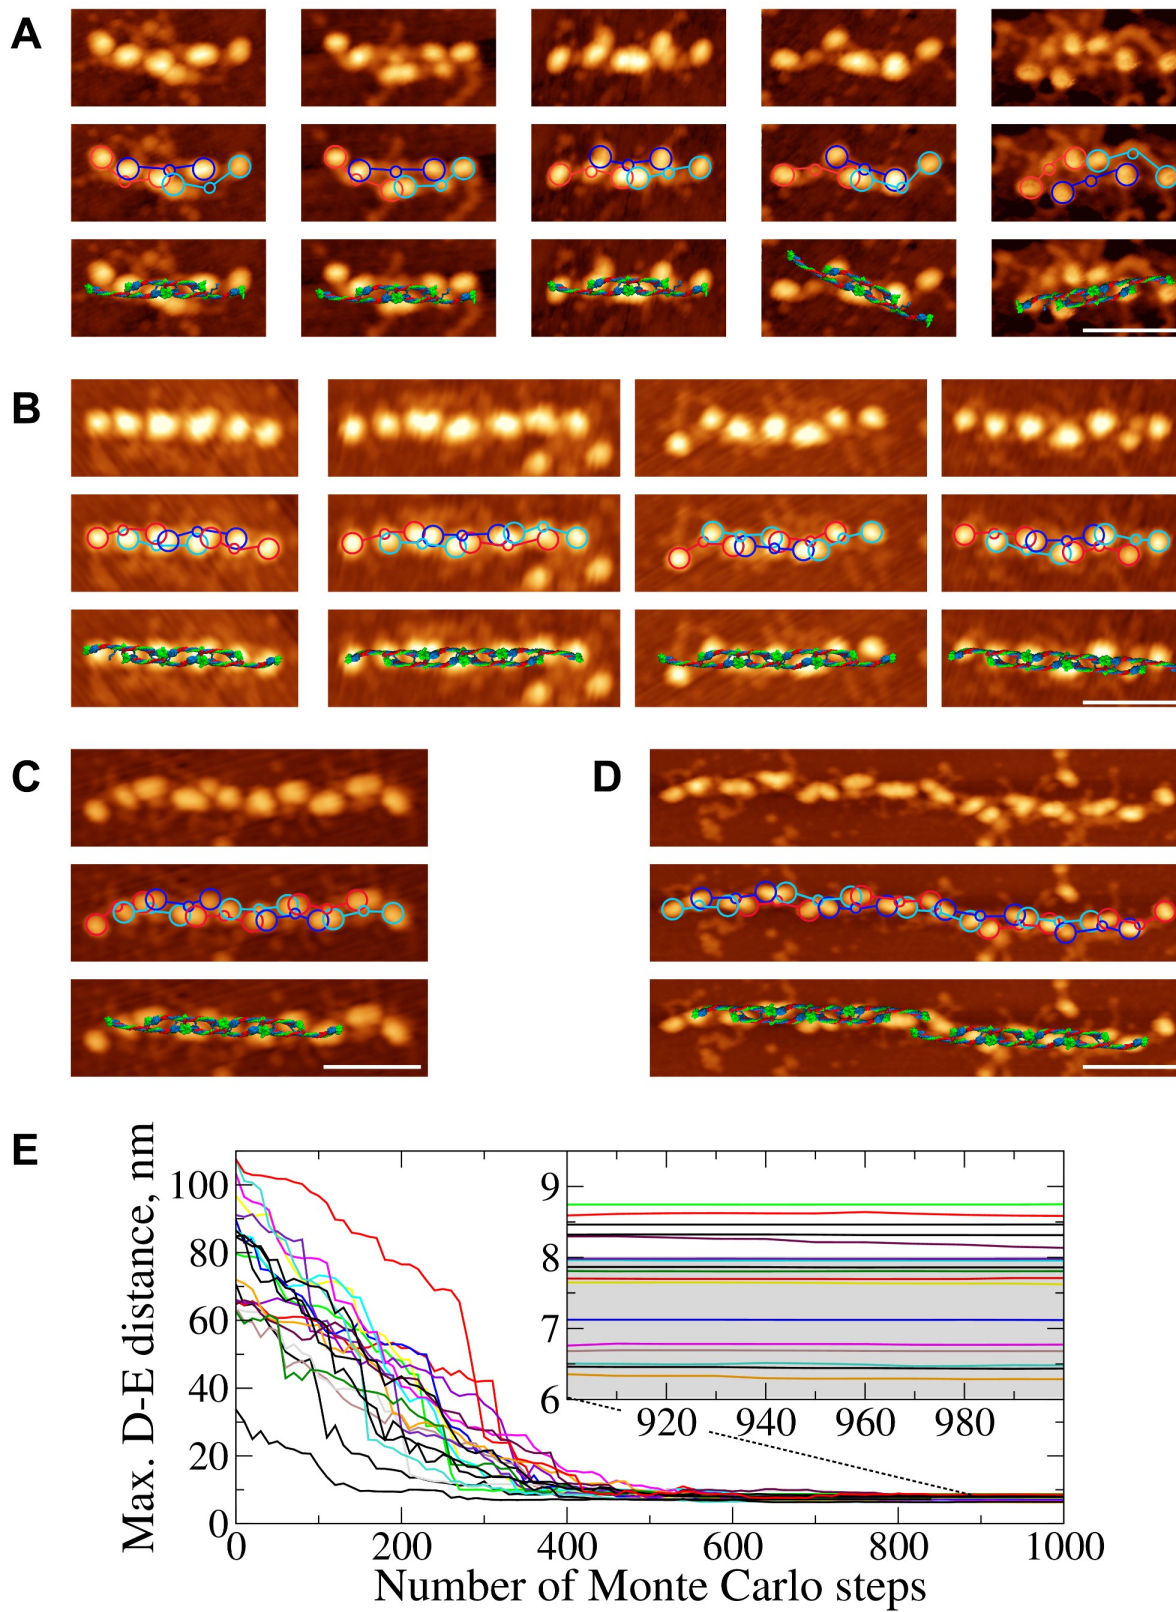

Figure S3

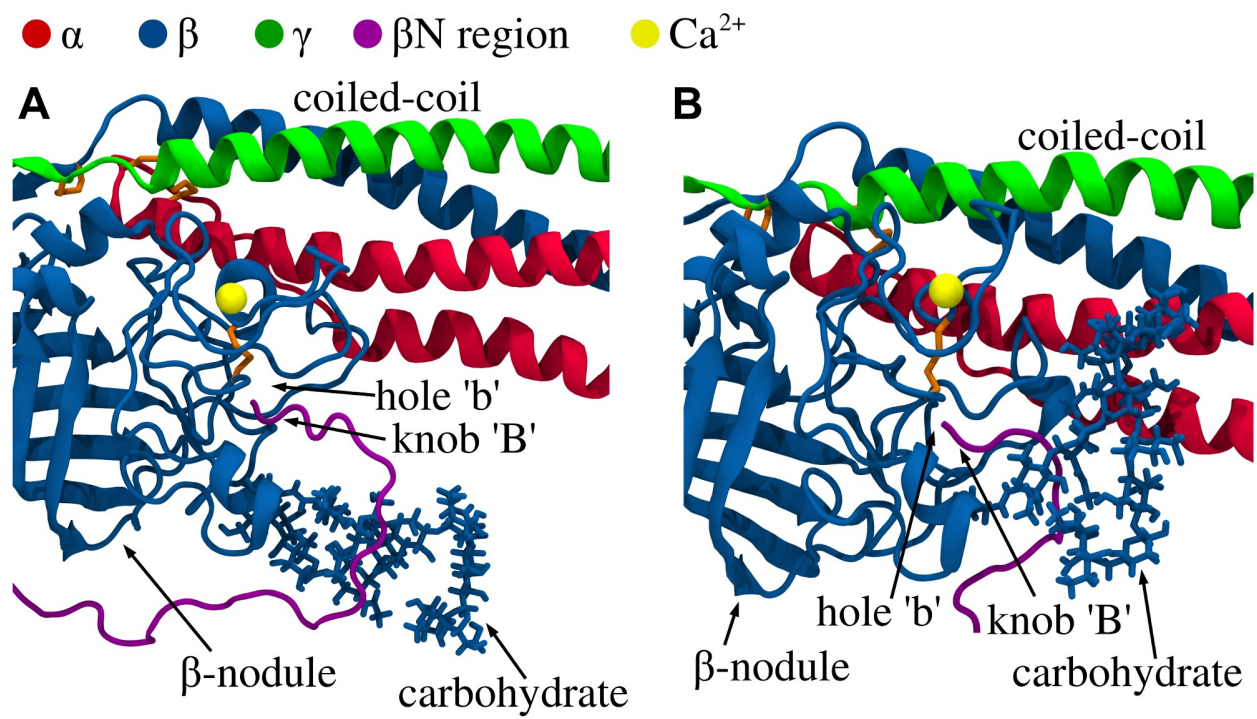

Figure S4

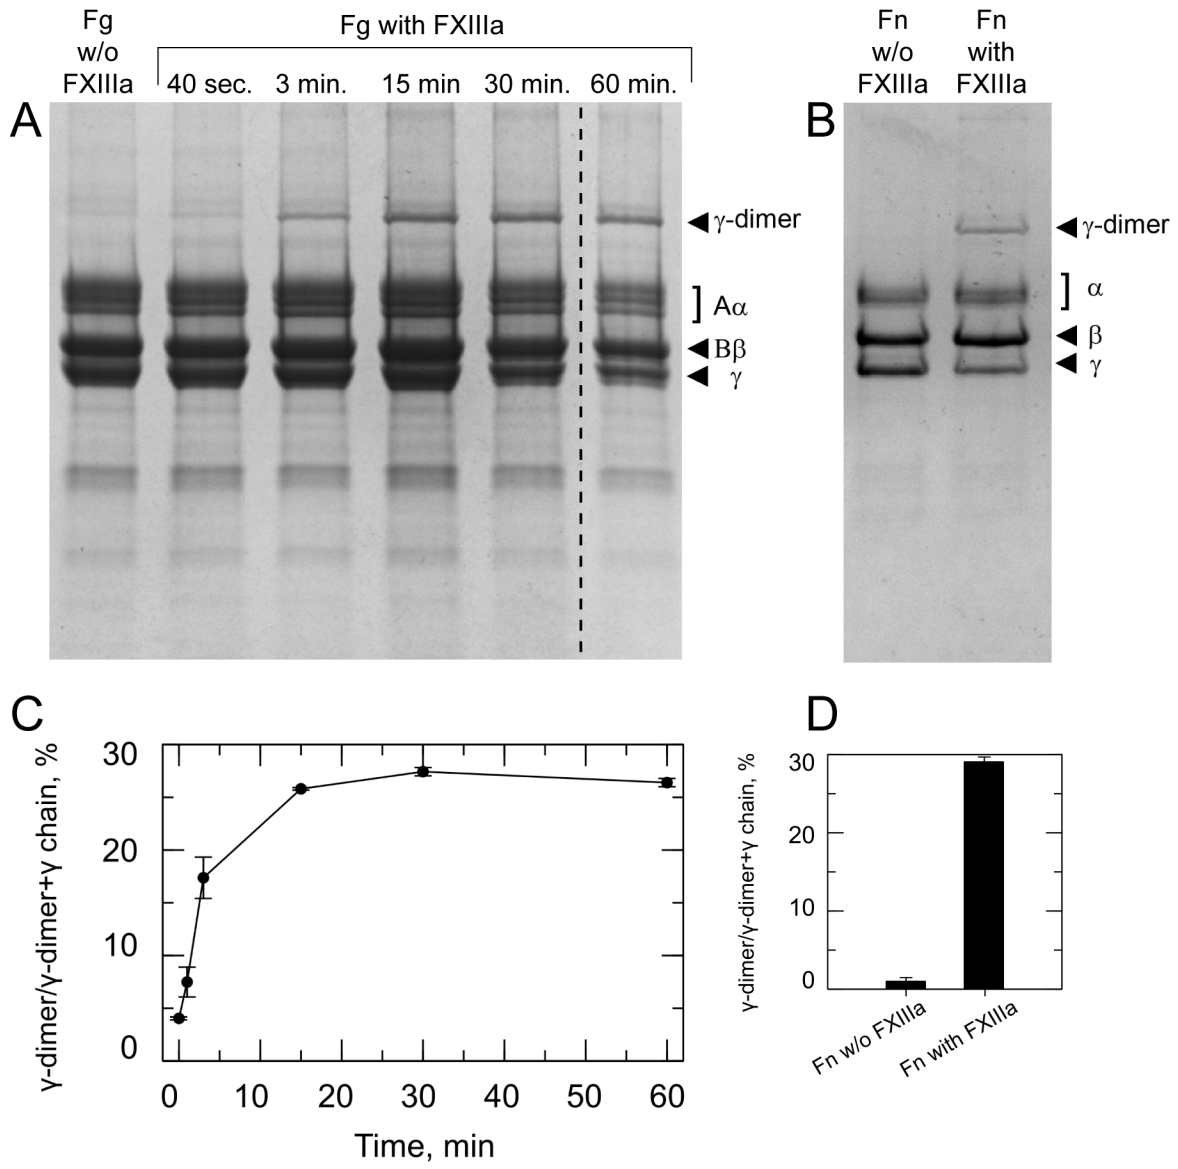

Figure S5



## SUPPLEMENTAL STRUCTURES

**Data S1 related to Figure 2D:** Structure alignment of two fibrin monomers obtained from the crystal structures of human fibrinogen. Positions of one monomer relative to the other are combined into 28 molecular models in one PDB file. The first model corresponds to the first monomer; the other 27 models correspond to the crystal structures accumulated in Table S1.

**Data S2 related to Figure 3D:** Structure of double-stranded fibrin oligomer FO<sub>2/3</sub> with  $\gamma$ - $\gamma$  crosslinks and A-a and B-b knob-hole bonds.

**Data S3 related to Figure 5:** Structure of the D-E-D fragment.

## SUPPLEMENTAL EXPERIMENTAL PROCEDURES

*Structure alignment with Kabsch algorithm* (Kabsch, 1976) is a method of finding an orthogonal transformation to overlap one set of atomic coordinates (for one structure) with another set (for another structure). Because the Kabsch algorithm minimizes the root-mean-squared deviations (RMSD) for any pair of structures, this method is widely used in the structure alignment of biomolecules. We utilized this approach to overlap two fibrinogen molecules with two fragments D at the D:D junction. We took two structures and selected the atoms to be aligned (we used the  $C_\alpha$  atoms in the globular parts of fibrinogen molecule). The two sets of coordinates of  $N$  atoms were organized into two  $3 \times N$  matrices  $X_1$  and  $X_2$ . Each row corresponded to the Cartesian coordinates of atoms from the first molecule (matrix  $X_1$ ) and the second molecule (matrix  $X_2$ ). Any two rows in  $X_1$  and  $X_2$  contained two sets of coordinates of atoms  $(x_1, y_1, z_1)$  and  $(x_2, y_2, z_2)$  to be aligned. Next, we defined the unitary rotation matrix  $U = (A^T A)^{1/2} A^{-1}$ , where  $A = X_1^T X_2$  (superscript T denotes the matrix transpose). To overlap the second molecule with the first, we applied the transformation  $U$  to the atomic coordinates in the second molecule.

*Normal mode analysis:* We used the structure containing two monomers connecting head-to-tail for the Normal Mode Analysis (NMA). The analysis was done using elNemo web-interface (Suhre and Sanejouand, 2004-1; Suhre and Sanejouand, 2004-2).

*Clustering analysis:* To identify structural invariant among 27 available crystal structures of D-D complexes, we performed clustering analysis. As a structural characteristic of the D:D interface, we used a vector containing all distances separating the  $C_\alpha$ -atoms of the first fragment D from the  $C_\alpha$ -atoms of the second fragment D. We computed the vectors for all available D-D structures and then performed k-means clustering analysis of these vectors to identify the clusters with similar structures. We found that 19 structures cluster around the bent conformation, whereas 5 structures cluster around the straight conformation. We identified the structures that were the closest to the centroid structures of these clusters – the PDB structures 1FZG (bent conformation) and 1N86 (straight conformation).

*Steps 1-3 of computational reconstruction of short fibrin oligomers.* We used the following Steps 1-3 to construct the atomic structures of double-stranded fibrin oligomer FO<sub>2/3</sub>. Step 1: Constructing fibrinogen dimer Fg<sub>2</sub> and trimer Fg<sub>3</sub> was performed using resolved crystallographic structures (Table S1) by connecting monomers end-to-end at the D-D junction. A particular double-D structure was aligned with the full-length fibrinogen so that one of the D regions of the double-D fragment overlapped with one of the D regions of the fibrinogen molecule. We used the Kabsch algorithm (Kabsch, 1976) to align the  $C_\alpha$ -atoms of the globular parts of the molecules. We superimposed the  $C_\alpha$ -atoms of resolved residues B $\beta$ 197-461 in the  $\beta$ -nodule and  $\gamma$ 139-411 in the  $\gamma$ -nodule. We repeated the above procedure used for Fg<sub>2</sub> to reconstruct Fg<sub>3</sub> (see also section “Constraints due to A-a knob-hole bonds” below). Step 2: Initial placement of two single-stranded fibrin polymers: We used the structures of Fg<sub>2</sub> and Fg<sub>3</sub> with straight and bent double-D fragments (PDB entries 1FZG and 1N86 respectively; Table S1). For FO<sub>2/3</sub>, the number of constraints due to A-a knob-hole bonds is 8 (Figure S2B). We performed initial placement of Fg<sub>2</sub> and Fg<sub>3</sub> subject to these constraints using Monte-Carlo docking (Figure 3B) with a 17Å target distance between residues Val20 in knob ‘A’ and  $\alpha$ Ala27 in the  $\alpha$  chain. Out of 14 structures generated starting from the straight conformation, we selected the structure with the shortest  $\alpha$ Val20-Ala27 distances (Figure 3C) varying in a range of 7-17Å (Figure S3E). Step 3: Incorporating unresolved residues: In the structure obtained in Step 2, the distances between the  $C_\alpha$ -atoms of Pro4 (GPRP) and  $\alpha$ Ala27 (central nodule) is <17Å, which allows knobs ‘A’ and ‘B’ to reach holes ‘a’ and ‘b’, respectively. We incorporated the following residues (VMD package; Humphrey et al., 1995): (i) GPRVVERHQS (with underlined knob ‘A’); (ii) GHRPLDKKREEAPSLRPAPPPISGGGYRARPAAKAAATQKKVER (with underlined knob ‘B’); (iii) PQQ (the C-terminus of the B $\beta$  chain); and (iv) GEGQQHHLGGAKQAGDV (the C-terminus of the  $\gamma$  chain with underlined  $\gamma$ - $\gamma$  crosslinking sites). The  $\gamma$ - $\gamma$  crosslinks were synthesized using a transglutamination patch connecting  $\gamma$ Glu399 and  $\gamma$ Lys406 of two adjacent  $\gamma$ -nodules (see section “Transglutamination *in silico*” below), and the A-a and B-b bonds were formed as described below. To refine the structure, we performed energy minimization with the steepest descent algorithm (Adcock and McCammon, 2006) implemented in our package for GPU-based MD simulations with a SASA implicit solvent model (Ferrara et al., 2002; Zhmurov et al., 2012).

*Constraints due to A-a knob-hole bonds:* Fibrinogen molecules were co-crystallized with synthetic peptides GPRP and GHRP mimicking knobs ‘A’ and ‘B’, respectively (PDB code: 3GHG, Kollman et al., 2009). The first resolved residue in the fibrinogen’s A $\alpha$  chain A $\alpha$ Ala27 is located in the E region (Figure 5 and Figure S2). The knob ‘A’

(GPR) in fibrin starts from the residue  $\alpha$ Gly17. In a double-stranded oligomer, the GPR-containing N-terminal sequence of the  $\alpha$  chain in one strand should reach the hole ‘a’ in another strand. We assumed that the interaction of the natural GPRV motif with hole ‘a’ is similar to binding of the synthetic GPRP peptide, i.e. the  $C_{\alpha}$ -atoms of residues  $\alpha$ Gly17-Val20 take the positions of residues Gly1-Pro4 of GPRP in hole ‘a’. Because the N-terminal  $A\alpha$  chain sequence  $A\alpha$ Ala1-Ala26 is unresolved (PDB code: 3GHG), this part of the fibrinogen molecule is unstructured. There are 6 amino acids connecting residue  $\alpha$ Val20 (inserted in hole ‘a’ along with knob ‘A’) and residue  $\alpha$ Ala27 in the central E region (Figure S2). With the 3.8Å amino acid length, the contour length of a chain connecting the  $C_{\alpha}$ -atoms of  $\alpha$ Val20 and  $\alpha$ Ala27 is  $7 \times 3.8\text{Å} = 26.6\text{Å}$  (Figure S2). This enabled us to introduce geometric constraints for double-stranded structures – all distances between the  $C_{\alpha}$ -atom of the last residue in knob ‘A’ ( $\alpha$ Val20) in hole ‘a’ and the  $C_{\alpha}$ -atom of  $\alpha$ Ala27 in the  $\alpha$  chain should be  $<26.6\text{Å}$  (Figure S2). This helped us to determine the initial position of the two strands in double-stranded oligomers.

*Monte-Carlo docking:* The Monte-Carlo simulations are widely used in rigid-body protein docking (Cherfils and Janin, 1993). In these simulations, one of the molecules is constrained and the other molecule is positioned on its surface randomly using small rotations or translations moves. The rotational or translational move is accepted if a uniformly distributed random number from the unit interval [0,1] is less than the value of

$$p = \min \left\{ 1, \exp \left[ -\frac{U_{n+1} - U_n}{kT} \right] \right\},$$

where  $U_n$  and  $U_{n+1}$  are the interaction energies of the protein-protein complex

computed at the  $n$ -th and  $n+1$ -st step. We used information about A-a knob-hole interactions between two fibrin molecules forming the complex. Because these interactions occur through flexible knobs ‘A’, they do not completely specify the relative position of the two monomers, and so we used the length of polypeptide chain ( $r$ ) in

$$\text{the interaction energy function: } U = \sum_{i=1}^I \frac{k_s (r_i - r_0)^2}{2},$$

where the summation is performed over all  $I$  specific

interactions (A-a knob-hole bonds),  $k_s = 10^3$  pN/nm is the spring constant,  $r_i$  is a current distance between the two ends of knob ‘A’, and  $r_0$  is the target distance. We carried out Monte-Carlo simulations starting from the structure of two randomly placed fibrin monomers separated by a 20-nm distance. The length (translations) and the angle (rotations) were adjustable. Initially, we used the maximum value of 10 nm for translations and  $10^\circ$  for rotations. If the first 100 steps were not successful (i.e., either steric clashes occurred or Metropolis criteria was not satisfied 100 times in a row), in the next 100 steps the value of the distance/angle was cut in half, etc. These simulations were continued until the distance and angle were less than 0.001 nm and  $0.001^\circ$ , respectively. We used Monte-Carlo docking in Step 2 (see Figure 3A in Main Text).

*Reconstructing residues missing in the crystal structures:* There are amino acid residues that are reported as unresolved in the crystal structures (see Table S1). These are functionally important unstructured and flexible parts of fibrinogen molecule, its structural portions, and various structural combinations. To incorporate these residues, we synthesized the polypeptide chain using the VMD program (Humphrey et al., 1995). When adding residues one at a time, we used the values of dihedral angles  $\varphi = -180^\circ$  and  $\psi = 180^\circ$  (linear conformation of polypeptide chain). These newly synthesized structures were properly translated/rotated and then covalently linked to resolved parts of the molecule. We used this in Step 3 (see Figure 3A in Main Text). The following residues were added to the crystal structure of each fibrin monomer: (1)  $\alpha$ 17-26 (knob ‘A’-containing motif); (2)  $\beta$ 15-57 (knob ‘B’-containing motif); (3)  $\beta$ 459-461 (the C-terminal part of the  $\beta$  chain); (4)  $\gamma$ 1-13 (the N-terminal part of the  $\gamma$  chain); and (5)  $\gamma$ 395-411 (the C-terminal part of the  $\gamma$  chain containing the  $\gamma$ - $\gamma$  crosslinking site).

*In silico formation of A-a and B-b knob-hole bonds:* There is a 7-residue-long unstructured sequence between knob ‘A’ and the first resolved residue in the  $\alpha$  chain that is missing in the PDB file. There is also a 30-residue-long missing unstructured sequence between knob ‘B’ and the first resolved residue in the  $\beta$  chain. These sequences connect GPR (in the  $\alpha$  chain) and GHRP (in the  $\beta$  chain) to the central globule in the E region of an adjacent fibrin molecule. As described in Step 3, we first synthesized the polypeptide chains VVERHQS (containing knob ‘A’) and LDKKREEAPSLRPAPPPISGGYRARPAAKAAATQKKVER (containing knob ‘B’). Next, we placed these peptides so that (1) the N-terminal part of each sequence is close to the last residue in the GPRP (GHRP) peptide and (2) the C-terminal part of each sequence is close to the first resolved residue in the corresponding portion of the central nodule. The N-terminal residues of the  $\alpha$  and  $\beta$  chains containing knobs ‘A’ (GPRV,  $\alpha$ 17-20) and ‘B’ (GHRP,  $\beta$ 15-18) were placed at the known positions of the corresponding peptides GPRP and GHRP co-crystallized with the full-length fibrinogen (PDB code 3GHG). In the GPRP peptide, the last residue is Pro4; in the knob ‘A’, the

corresponding residue is  $\alpha$ Val20 ( $\alpha$ Val20 is not a part the active portion of knob ‘A’), so we reproduced positions only for the backbone atoms. After initial placement, the system was energy-minimized while the sequences GPRP and GHRP were constrained to remain in holes ‘a’ and ‘b’, respectively, to avoid the A-a and B-b knob-hole bonds dissociation.

*Transglutamination in silico:* The  $\gamma$ - $\gamma$  crosslinks are covalent bonds connecting (i) residues  $\gamma$ Glu398 or  $\gamma$ Glu399 in the first fibrin monomer and residue  $\gamma$ Lys406 in the second monomer; and (ii) residues  $\gamma$ Glu398 or  $\gamma$ Glu399 in the second monomer and residue  $\gamma$ Lys406 in the first monomer. These bonds are created by an enzyme factor XIIIa through the transglutamination reaction, during which the covalent isopeptide bond is formed between the  $\gamma$ -acyl group of glutamyl and the  $\epsilon$ -amine group of lysyl. The  $C_\gamma$ -atom of glutamine residue was connected to the  $C=O$ -group, which was connected to the  $NH$ -group which, in turn, was connected to the  $C_\epsilon$ -atom of lysyl. This structure resembles the backbone of two consecutive glycine residues, which allows us to describe the  $\gamma$ - $\gamma$  crosslinks using the force field parameters for the protein backbone: CHARMM36 for proteins and carbohydrates for the MD simulations in explicit solvent; and CHARMM19 for the MD simulations in implicit water. The atoms that are released upon the transglutamination reaction (i.e. glutamine  $NH_2$ -group and two hydrogen atoms from the lysine residue) were removed. We placed sequences  $\gamma$ 395-411 next to each other so that (a) the first unresolved residues ( $\gamma$ Gly395) were in the vicinity of the last resolved residues ( $\gamma$ Ile394) in the  $\gamma$ -nodules and (b)  $\gamma$ Gln398 and  $\gamma$ Lys406 in the first  $\gamma$ -nodule were close to  $\gamma$ Lys406 and  $\gamma$ Gln398 in the second  $\gamma$ -nodule. Next, we covalently linked two  $\gamma$ Gln398 with two  $\gamma$ Lys406. Hence, for each  $\gamma$ - $\gamma$  crosslink in each double-D region we created two covalent bonds: (1)  $\gamma$ Glu398 in the first fibrin monomer was connected with  $\gamma$ Lys406 in the second monomer and (2)  $\gamma$ Glu398 in the second fibrin monomer was connected with  $\gamma$ Lys406 in the first monomer.

*MD simulations:* The all-atom MD simulations in explicit solvent (water) were performed using NAMD software (Phillips et al., 2005) with CHARMM36 force-field (MacKerell et al., 1998). The  $\gamma$ -E- $\gamma$  construct was solvated in a 10.6 nm $\times$ 6.6 nm $\times$ 11.8 nm TIP3P-water box with 0.15M NaCl (pH=7; 75,035 atoms). The D-E-D construct was solvated in a 26.0 nm $\times$ 13.3 nm $\times$ 7.7 nm water box with 0.15M NaCl (pH=7; 243,953 atoms). We used the 12Å cutoff distance. The long range electrostatics was described with the particle mesh Ewald method. In the all-atom MD simulations in implicit water, we employed the Solvent Accessible Surface Area (SASA) model of implicit solvation, which is based on CHARMM19 force field. In the SASA model based energy calculation, the mean solvation energy  $\Delta G_{solv}(r)$  is proportional to the solvent accessible surface area (SASA) of a solute molecule:

$$\Delta G_{solv}(r) = \sum_{i=1}^N \sigma_i A_i(r),$$

where  $\sigma_i$  is the atomic solvation parameter and  $A_i(r)$  is the SASA for the  $i$ -th atom (Ferrara et al., 2002).



## SUPPLEMENTAL REFERENCES:

- Adcock S.A., McCammon J.A. (2006). Molecular dynamics: survey of methods for simulating the activity of proteins. *Chem. Rev.* *106*, 1589–1615.
- Betts, L., Merenbloom, B.K., and Lord, S.T. (2006). The structure of fibrinogen fragment D with ‘A’ knob peptide GPRVVE. *J. Thromb. Haemost.* *4*, 1139–1141.
- Bowley, S.R., Merenbloom, B.K., Okumura, N., Betts, L., Heroux, A., Gorkun, O.V., and Lord, S.T. (2008). Polymerization-defective fibrinogen variant  $\gamma$ D364A binds knob ‘A’ peptide mimic. *Biochemistry* *47*, 8607–8613.
- Cherfils J., Janin J. (1993) Protein docking algorithms: simulating molecular recognition. *Curr. Opin. Struct. Biol.* *3*, 265–269.
- Doolittle, R.F., Chen, A., and Pandi, L. (2006). Differences in binding specificity for the homologous  $\gamma$ - and  $\beta$ -chain ‘holes’ on fibrinogen: exclusive binding of Ala-His-Arg-Pro-amide by the  $\beta$ -chain hole. *Biochemistry* *45*, 13962–13969.
- Doolittle, R.F., and Pandi, L. (2007). Probing the beta-chain hole of fibrinogen with synthetic peptides that differ at their amino termini. *Biochemistry* *46*, 10033–10038.
- Everse, S.J., Spraggon, G., Veerapandian, L., and Doolittle, R.F. (1999). Conformational changes in fragments D and double-D from human fibrin(ogen) upon binding the peptide ligand Gly-His-Arg-Pro-amide. *Biochemistry* *38*, 2941–2946.
- Ferrara, P., Apostolakis, J. and Caflisch, A. (2002). Evaluation of a fast implicit solvent model for molecular dynamics simulations. *Proteins* *46*, 24–33.
- Humphrey, W., Dalke, A. and Schulten, K. (1995). VMD - Visual Molecular Dynamics. *J. Molec. Graphics* *14*, 33–38.
- Kabsch, W. (1976). A solution for the best rotation to relate two sets of vectors. *Acta Crystallographica* *32*, 922–923.
- Kostelansky, M.S., Bolliger-Stucki, B., Betts, L., Gorkun, O.V., and Lord, S.T. (2004). B $\beta$ Glu397 and B $\beta$ Asp398 but not B $\beta$ Asp432 are required for ‘B:b’ interactions. *Biochemistry* *43*, 2465–2474.
- Kostelansky, M.S., Lounes, K.C., Ping, L.F., Dickerson, S.K., Gorkun, O.V., Lord, S.T. (2007). Probing the  $\gamma$ 2 calcium-binding site: studies with  $\gamma$ D298,301A fibrinogen reveal changes in the  $\gamma$ 294-301 Loop that alter the integrity of the ‘a’ polymerization site. *Biochemistry* *46*, 5114–5123.
- MacKerell, Jr., A.D., et. al. (1998) All-atom empirical potential for molecular modeling and dynamics studies of proteins. *J. Phys. Chem. B* *102*, 3586–3616.
- Medved, L., and Weisel, J. W. (2009). Recommendations for nomenclature on fibrinogen and fibrin. *J. Thromb. Haemost.* *7*, 355-359.
- Pandi, L., Kollman, J.M., Lopez-Lira, F., Burrows, J.M., Riley, M., and Doolittle, R.F. (2009). Two families of synthetic peptides that enhance fibrin turbidity and delay fibrinolysis by different mechanisms. *Biochemistry* *48*, 7201–7208.
- Phillips, J.C., Braun, R., Wang, W., Gumbart, J., Tajkhorshid, E., Villa, E., Chipot, C., Skeel, R.D., Kalé, L. and Schulten, K. (2005) Scalable molecular dynamics with NAMD. *J. Comput. Chem.* *26*, 1781–1802.
- Spraggon, G., Everse, S.J., and Doolittle, R.F. (1997). Crystal structures of fragment D from human fibrinogen and its crosslinked counterpart from fibrin. *Nature* *389*, 455–462.

Suhre, K., Sanejouand, Y. H. (2004). ElNemo: a normal mode web server for protein movement analysis and the generation of templates for molecular replacement. *Nucleic Acids Res.* 32(suppl 2), W610–W614.

Suhre, K., Sanejouand, Y. H. (2004). On the potential of normal-mode analysis for solving difficult molecular-replacement problems. *Acta Crystallog. D* 60, 796–799.
